# 1 Evolutionary gain and loss of a plant pattern-recognition receptor for HAMP recognition

2 Simon Snoeck<sup>1</sup>, Bradley W. Abramson<sup>2</sup>, Anthony G. K. Garcia<sup>1</sup>, Ashley N. Egan<sup>3</sup>, Todd P.  
3 Michael<sup>2</sup>, Adam D. Steinbrenner<sup>1, \*</sup>

4 <sup>1</sup>Department of Biology, University of Washington, Seattle, Washington 98195, USA

5 <sup>2</sup>The Plant Molecular and Cellular Biology Laboratory, The Salk Institute for Biological  
6 Studies, La Jolla, California 92037, USA

7 <sup>3</sup>Department of Biology, Utah Valley University, Orem, Utah 84058, USA

8 \*Author for correspondence: [astein10@uw.edu](mailto:astein10@uw.edu)

## 9 Abstract

10 Pattern recognition receptors (PRR) recognize distinct pathogen and herbivore-associated  
11 molecular patterns (PAMPs and HAMPs) and mediate activation of immune responses, but the  
12 evolution of new PRR sensing functions is not well understood. We employed comparative  
13 genomics and functional analysis to define evolutionary events leading to the sensing of the  
14 peptide HAMP inceptin (In11) by the PRR Inceptin Receptor (INR). Existing and *de novo* genome  
15 assemblies revealed that the presence of a functional *INR* gene corresponded with In11 response  
16 across 55 million years (my) of legume evolution, and that In11 recognition is unique to the clade  
17 of Phaseoloid legumes. The *INR* loci of certain Phaseoloid and non-Phaseoloid species also  
18 contain diverse INR-like homologues, suggesting that the evolution of INR receptor function ~28  
19 mya occurred after an ancestral gene insertion ~32 mya. Functional analysis of chimeric and  
20 ancestrally reconstructed receptors revealed that specific AA differences in the C1 leucine-rich  
21 repeat (LRR) domain and C2 intervening motif likely mediated gain of In11 recognition. In  
22 summary, we present a conceptual model for the evolution of a defined PRR function based on  
23 patterns of *INR* variation in legumes.

## 24 Introduction

25 Plants use a combination of constitutive and inducible defensive traits to resist challenges by  
26 pathogens and herbivores. Activation of inducible defenses requires perception of the threat<sup>1</sup>,  
27 mediated by an innate immune system that uses germline-encoded pattern recognition receptors  
28 (PRRs) at the cell surface to recognize pathogen, herbivore, and damage-associated molecular  
29 patterns (PAMPs, HAMPs, and DAMPs)<sup>2,3</sup>. Well-characterized PRRs in the large receptor kinase  
30 (RK) family comprise an extracellular domain, a single-pass transmembrane motif, and an  
31 intracellular kinase domain<sup>4</sup>. Receptor-like proteins (RLPs) share structural similarities with RKs  
32 but lack a kinase domain<sup>5,6</sup>. The most common extracellular domain of RK/RLPs is a series of  
33 leucine-rich repeats (LRRs), which are known to mediate elicitor binding and co-receptor  
34 association<sup>7-11</sup>. LRR-RK/RLPs form a large gene family; the *Arabidopsis thaliana* genome  
35 contains about 223 LRR-RKs and 57 LRR-RLPs<sup>5,6,8,12</sup>, and the number of annotated RK/RLPs  
36 per genome varies across and between plant families<sup>11,13</sup>. Moreover, comparative genomic  
37 analyses of LRR-RK/RLPs involved in biotic interactions have revealed strong diversifying  
38 selection, lineage-specific expanded gene clusters and immune receptor repertoire variation both  
39 within and between species<sup>6,14-17</sup>.

40 Evidence is accumulating for diverse roles of RLPs as immune sensors<sup>14,17</sup>. Various LRR-RLPs  
41 from *Arabidopsis*, tomato, and cowpea have been shown to detect molecular patterns from fungi,

42 bacteria, parasitic weeds and herbivores<sup>3,14</sup>. Cf-9, Cf-4 and Cf-2 interact with respective molecular  
43 patterns of *Cladosporium fulvum*, Avr9, Avr4 and Avr2 (via host protein Rcr3), and are at least  
44 restricted to the *Solanum* genus<sup>18–24</sup>. Arabidopsis RLP42 recognizes fungal  
45 endopolygalacturonases (PG) epitope pg9(At) derived from *Botrytis cinerea*<sup>25,26</sup>. Similarly, RLP23  
46 is an Arabidopsis-specific LRR-RLP, which recognizes nlp20 peptide from the NECROSIS AND  
47 ETHYLENE-INDUCING PEPTIDE1 (NEP1)-LIKE PROTEINS (NLPs) found in  
48 bacterial/fungal/oomycete species<sup>14,27</sup>. ReMAX is restricted to the Brassicaceae and triggered by  
49 the MAMP eMax originating from *Xanthomonas*<sup>28</sup>. *Cuscuta* Receptor1 (*CuRe1*) is specific to  
50 *Solanum lycopersicum* and senses the peptide Crip21 which originates from parasitic plants of  
51 the genus *Cuscuta*<sup>29,30</sup>. Finally, the inceptin receptor (INR) appears to be specific to the legume  
52 tribe Phaseoleae and recognizes inceptin (In11), a HAMP found in the oral secretion of multiple  
53 caterpillars<sup>31–34</sup>. Notably, all the above examples of LRR-RLPs are family-specific, restricted to  
54 the Solanaceae (Cf-2, Cf-4, Cf-9 and *CuRe1*), Brassicaceae (RLP23, RLP42, ReMAX) or  
55 Leguminosae (tribe Phaseoleae) (INR)<sup>17,26</sup>. However, despite clear signatures of lineage-specific  
56 functions, specific evolutionary steps leading to novel PRR functions across multiple species have  
57 not been described.

58 Mechanistic understanding of LRR-RLP sensing functions is also currently limited. No structural  
59 data exists for any PAMP or HAMP sensing LRR-RLP<sup>26,35</sup>. Genetic experiments using truncated  
60 or chimeric receptors have revealed subdomains essential for function of RLP23 and RLP42<sup>26,35</sup>,  
61 but whether similar regions mediate function for other LRR-RLPs is not clear. An alternative  
62 approach, Ancestral Sequence Reconstruction (ASR), leverages the specificity of receptor  
63 homologues for a certain PAMP/HAMP to study the emergence of a recognition function<sup>36,37</sup>. ASR  
64 requires dense gene trees with clearly defined sets of functional and non-functional receptors.  
65 Such data are currently unavailable for any LRR-RLP, partly due the lack of relevant high-quality  
66 genomes in closely related non-model species. Moreover, the highly duplicate-rich nature of LRR-  
67 RLP-encoding loci complicates gene annotation. However, long-read sequencing has increased  
68 the quality of *de novo* assemblies, facilitating the annotation of receptor genes at complex  
69 receptor loci<sup>17,38,39</sup>. Importantly, LRR-RLP recognition functions can generally be rapidly assessed  
70 through expression in a model plant, wild tobacco (*Nicotiana benthamiana*)<sup>26,31,35,40</sup>. A  
71 heterologous model allows rapid functional validation of potential LRR-RLP homologues, chimeric  
72 receptors and statistically inferred ancestral sequences.

73 In this study, we use the legume-specific LRR-RLP INR as a model to perform dense species  
74 phenotyping, comparative genomics, and functional validation, to associate gain and loss of  
75 In11 response with evolution of the contiguous *INR* receptor locus. By leveraging both existing  
76 high-quality assemblies and long-read sequencing in key legume species, we were able to  
77 study the evolution of the *INR* locus. We show that In11 response is restricted to species in the  
78 clade of the Phaseoloid legumes, which includes the agriculturally important subtribes  
79 Phaseolinae, Glycininae and Cajaninae. The contiguous receptor locus which includes *INR* is  
80 dynamic and predates the evolution of Phaseoloids, but the presence of an *INR* homologue  
81 strictly corresponds with the recognition of In11. Finally, we used chimeric and ancestrally  
82 reconstructed LRR-RLPs to gain insight into the key domains and amino acids (AA) involved in  
83 In11 recognition. We present a conceptual model for the evolution of LRR-RLP function based  
84 on patterns of INR variation in legumes.

## 85 Results

### 86 In11 perception is restricted to certain legume species within the Phaseoloid clade.

87 In11 response was previously thought to be restricted to a subtribe of the legume family, the  
88 Phaseolinae, which includes cowpea (*Vigna unguiculata*) and common bean (*Phaseolus vulgaris*)  
89 but excludes soybean (*Glycine max*)<sup>31</sup>. To understand emergence of INR function within legumes  
90 with a higher precision, we measured ethylene accumulation triggered by In11 as a defense  
91 marker across a set of twenty-two legume species of the NPAAA papilionoids (Fig. 1a Suppl.  
92 Table 1, Suppl. Table 2). Response to In11 was only observed in plant species within the  
93 monophyletic subclade of the Phaseoloids. Hence, phylogenetic evidence suggests a single origin  
94 of In11 response at the base of the Phaseoloid legumes ca 28 mya (Fig. 1b, ★). Several of the  
95 tested plant species/accessions within this clade were unable to respond to In11, namely  
96 *Hylodesmum podocarpum*, winged bean (*Psophocarpus tetragonolobus*), *G. max*, yam bean  
97 (*Pachyrhizus erosus*) and calopo (*Calopogonium mucunoides*), although they were able to  
98 respond to the unrelated bacterial elicitor flg22 (Suppl. Fig. 1). These observations suggest the  
99 occurrence of multiple independent losses of In11 response throughout Phaseoloid evolution after  
100 the initial emergence of this function.

### 101 The contiguous *INR* locus shows LRR-RLP copy number variation in the Millettoids.

102 To explore gain and loss of In11 response in relation to its defined PRR, we analyzed the evolution  
103 of its cognate receptor *INR*, and its genomic locus, in existing reference genomes and high quality  
104 *de novo* genome assemblies of key Phaseoloid and non-Phaseoloid species. We focused *de*  
105 *nov*o sequencing efforts on nodes separating In11-responsive and unresponsive species in the  
106 phylogeny for comparative genomic analysis (Fig. 1b). The contiguous *INR* locus was extracted  
107 from sixteen existing legume genomes and four *de novo* assemblies: *P. erosus*, guar bean  
108 (*Cyamopsis tetragonoloba*), jack bean (*Canavalia ensiformis*) and *H. podocarpum*) (Fig. 2, Suppl.  
109 Table 3)<sup>31</sup>. For *de novo* assemblies obtained in this study, a combination of Nanopore and Illumina  
110 sequence data enabled the assembly of a contiguous *INR* locus in all sequenced species (Suppl.  
111 Table 4).

112 The organization of the *INR* locus is highly diverse among legumes (Fig. 2a), with zero to seven  
113 LRR-RLP encoding-genes per species. For all Millettoid species, BLASTN search did not identify  
114 any regions with higher score than sequences at the contiguous *INR* locus of the respective  
115 species, strongly suggesting that all potential *INR* homologues are encoded at this locus. Legume  
116 species within the Hologalegina, *Lotus angustifolius*, chickpea (*Cicer arietinum*), *Medicago*  
117 *truncatula* and clover (*Trifolium pratense*), do not contain an LRR-RLP encoding gene at the  
118 locus, whereas all species within the Millettoids except for *P. erosus* contained at least one LRR-  
119 RLP, consistent with a gene insertion event of an LRR-RLP at the *INR* locus in the ancestor of  
120 extant Millettoids (Fig. 1a). To investigate this emergence, we analyzed the *de novo* assembly of  
121 *C. tetragonoloba*, a close outgroup of Millettoid legumes (Fig. 1b)<sup>41,42</sup>. As with all species within  
122 the outgroup Hologalegina, no LRR-RLP was present between the conserved neighboring genes  
123 (i.e. anchor genes), nor did we find an LRR-RLP with greater than 68% similarity in the whole  
124 genome, strengthening support for a single ancestral RLP gene insertion event ca 32 mya (Fig.  
125 2a).

126 In contrast to other closely related legume species, BLASTN analysis of the contiguous *INR* locus  
127 of *P. erosus* revealed only partial coding sequence fragments with homology to LRR-RLPs, and  
128 consequently the absence of an *INR* homologue (Fig. 2b). The *de novo* assembly of the locus

129 was validated by performing PCR spanning the complete disruption and Sanger sequencing of  
130 the resulting amplicon. The absence of an *INR* homologue in *P. erosus* corresponds with species  
131 phenotype, namely the lack of induced ethylene response after In11 treatment (Fig. 1a).

132 **In11-induced functions are conferred by a single clade of LRR-RLPs (*INR* clade).**

133 To associate *INR* locus variation with the variable In11 responses (Fig. 1), we next investigated  
134 the function and relationship of individual LRR-RLP homologues at the contiguous *INR* locus. We  
135 performed a maximum-likelihood phylogenetic analysis on the protein sequences of the LRR-  
136 RLPs within the locus across sixteen Millettoid species (Fig. 2). This analysis was supplemented  
137 with the closest related LRR-RLP genes outside the contiguous *INR* locus from *V. unguiculata*  
138 and *P. vulgaris*: *Phvul.007g246600* and *Vigun07g039700* (Suppl. File 2). A well-supported clade  
139 which includes the previously characterized functional *INR* from *V. unguiculata* (*Vigun07g219600*)  
140 also contained a single ortholog exclusively from plant species able to respond to In11 (Fig. 3)<sup>31</sup>.  
141 Hence, we hypothesized that this clade contains functional *INR* homologues which can confer  
142 In11-induced functions. To validate the putative *INR* clade, five genes (*Vigun07g219600*,  
143 *Phvul.007G077500*, *Mlathy INR*, *C.cajan\_07316* and *Mprur INR*) within this clade were cloned  
144 and transiently expressed in the non-legume model species *N. benthamiana*. In11-induced  
145 ethylene and reactive oxygen species (ROS) production were able to be conferred by each gene  
146 (Suppl. Fig. 3), consistent with a conserved *INR* function in the *INR* clade (Fig. 3, blue labels).

147 To assess if more distantly related, *INR*-like homologues could also confer In11 recognition, we  
148 measured ethylene and ROS production upon expression of LRR-RLPs outside the *INR* clade.  
149 Intriguingly, the sister clade to the *INR* clade contains LRR-RLPs from 9 out of 11 species which  
150 also have a predicted *INR* homologue in the *INR* clade itself (Fig. 3). Within this clade, we cloned  
151 and transiently expressed the LRR-RLP of *V. unguiculata* (*Vigun07g219700*). Except for *P.*  
152 *vulgaris* G19833, all studied Phaseolinae have an LRR-RLP in the two clades discussed above  
153 (Fig. 2). The remaining species, *G. max*, *Glycine soja*, *H. podocarpum*, *C. ensiformis* and *Abrus*  
154 *preparatorius*, were In11-unresponsive (Fig. 1) and solely encode LRR-RLP receptors which fall  
155 outside the *INR* clade and its sister clade. From this group we cloned and transiently expressed  
156 the soybean LRR-RLP (*Glyma.10G228000*). Finally, we tested the most closely related LRR-RLP  
157 to *INR* outside the contiguous *INR* locus for both *V. unguiculata* and *P. vulgaris* (*Vigun07g039700*  
158 and *Phvul.007g246600*). No In11-induced responses could be observed upon heterologous  
159 expression of *Vigun07g219700*, *Glyma.10G228000*, *Vigun07g039700* and *Phvul.007g246600*  
160 (Fig. 3 and Suppl. Fig. 3). Proteins of these non-responsive LRR-RLPs were similarly or more  
161 strongly expressed in *N. benthamiana* relative to the lowest expressed responsive LRR-RLP  
162 (*C.cajan\_07316 INR*) (Suppl. Fig. 4A), except for the marginally lower expressed  
163 *Vigun07g039700*, which contrasts with its closest related gene in *P. vulgaris* (*Phvul.007g246600*,  
164 87% AA similarity). Thus, the ability to confer In11-induced ROS and ethylene production is strictly  
165 limited to members of the *INR* clade.

166 We identified and dated potential gene duplications and losses at the contiguous *INR* locus  
167 throughout its evolution within the Millettoids using NOTUNG (Suppl. Fig. 2)<sup>43</sup>. Reconciliation  
168 analysis between gene and species trees revealed a complex evolutionary history comprising 19  
169 gene duplications and 20 gene losses in total. Within the Millettoids, a single duplication event  
170 gave rise to the *INR* clade containing all *INR* homologues and its sister clade which contains the  
171 closest related *INR*-like homologues. *P. vulgaris* and *Mucuna pruriens* contain an *INR* clade  
172 homologue but not members of the sister *INR*-like 1 clade, consistent with two independent gene  
173 losses. In contrast, the analysis predicts the ancestral loss of an *INR* homologue within the *INR*

174 clade for *G. soya*, *G. max* and *H. podocarpum* and clade specific duplication events resulting in  
175 LRR-RLP expansions of 4-7 tandem duplicates. To confirm that *INR* was lost in *Glycine* and not  
176 just in reference assemblies, we performed BLASTP searches using Vigun07g219700 AA  
177 sequence against 26 *G. soya* and *G. max de novo* assemblies from a recent pangenome  
178 analysis<sup>44</sup>. Like the *Glycine* reference genomes, no BLASTP hits to Vu07g219600 for any of the  
179 26 de novo assemblies were identified that had an AA similarity higher than 76%, suggesting that  
180 *INR* was lost before the speciation of *G. max* and *G. soya*, *i.e.* prior to soybean domestication.

### 181 The C1 and C2 subdomain of the LRR ectodomain mediate In11-induced functions

182 To understand receptor subdomains contributing to the functional *INR* clade, we assembled nine  
183 chimeric receptors combining *Vigun07g219600* (*VuINR* hereafter) and paralogous  
184 *Vigun07g219700* (*VuINR*-like, 72% AA similarity) (Suppl. File 3). Both genes contain a typical  
185 LRR-RLP extracellular domain with 29 LRRs interrupted by a 14-AA intervening motif (C2 domain)  
186 (Fig. 4)<sup>31</sup>. Chimeric receptors were expressed at a similar level in *N. benthamiana* and their  
187 response to In11 was assessed by quantifying peptide-induced ethylene and ROS (Fig. 4, Suppl.  
188 Fig. 4b). Chimeric receptors with the *VuINR*-like C1 domain were not responsive to In11. In  
189 contrast, all chimeric receptors containing the C1-C2 of *VuINR* responded to In11 treatment with  
190 both an ethylene and ROS burst (219600-F, 219600-C3, 219600-C2 and C1-219600, Fig. 4a).  
191 Intriguingly, the chimeric receptor 219600-C1, containing C1 of *VuINR* and C2 of *VuINR*-like,  
192 resulted in In11-independent autoactivity. Additionally, the chimeric receptor 219600-C2,  
193 responds to In11 but has a delayed ROS burst relative to all other In11-responsive constructs  
194 tested. In summary, the *VuINR* LRR subdomains C1 and C2 are both required for In11 response  
195 in chimeric receptors.

### 196 Ancestral sequence reconstruction (ASR) of the *INR* LRR domain

197 To further understand the molecular basis for functional divergence between *INR* and  
198 unresponsive *INR*-like homologues, we predicted multiple ancestral sequences of the  
199 monophyletic In11-responsive *INR* clade and its non-responsive *INR*-like 1 sister clade (Fig.5,  
200 Suppl. Fig.5, Suppl. File 4). To perform ASR, we first confirmed that nodes of interest for  
201 reconstruction were well supported by both neighbor-joining (NJ) and maximum likelihood (ML)  
202 gene phylogenies (Suppl. Fig. 5). Subsequently, we reconstructed the ancestral sequences for  
203 the LRR domain using FastML (Suppl. File 4)<sup>45</sup>, synthesized their predicted sequences and  
204 ligated the resulting LRR domains with flanking domains (A-B and D-G) from *VuINR* to complete  
205 the ancestral receptor constructs (Fig. 5b). Protein expression in *N. benthamiana* was similar  
206 across all ASR variants (Suppl. Fig. 4c).

207 Ancestral receptors to the *INR* clade of the *Vigna*, *Phaseolus* and *Macroptilium* (N7), the  
208 Phaseolinae (N6) and the Phaseoloids (N4) conferred In11-induced ethylene and ROS response.  
209 In contrast, ancestral receptors of the *INR*-like 1 clade of the Phaseolinae (N16) and the  
210 Phaseoloids (N14) were not responsive to In11 (Fig. 5d, Fig. 5c). Moreover, the common  
211 ancestral receptor of the *INR* and its *INR*-like 1 sister clade (N3) is not responsive to In11 (Fig.  
212 5). Hence, a small number of differences, 16 of 720 AA, between the LRR domain of N3 and N4,  
213 mediate differential In11 response. Moreover, only a subset of those AA is conserved within all  
214 LRR-RLPs of the *INR* clade and absent in all LRR-RLPs of the *INR*-like 1 sister clade (Suppl. Fig.  
215 6).

## 216 Discussion

217 Here we described the evolution of the legume-specific LRR-RLP INR as a functional and  
218 comparative genomic model to study A) responsiveness of an LRR-RLP against a defined elicitor  
219 and B) the evolution of novel PRR functions. We identified plant species which contain or lack a  
220 functional INR homologue, corresponding with response to the In11 HAMP elicitor. We present a  
221 conceptual model for the evolution of a novel LRR-RLP function based on patterns of *INR* locus  
222 variation in legumes. Finally, comparisons between In11-responsive and unresponsive  
223 homologues, especially through chimeric receptors and ASR, resolve potential key AA residues  
224 which mediate peptide recognition and response. Our work illuminates themes in the evolution of  
225 lineage-specific immune sensing functions, which will inform the broad use of PRRs as resistance  
226 traits<sup>46-49</sup>.

227 Evolutionary analysis of diverse plant phenotypic responses to a single PAMP or HAMP is rarely  
228 performed, although this can be a powerful approach to understand the emergence of specific  
229 immune receptor functions<sup>2</sup>. Patterns of In11 responses across twenty-two legume species  
230 indicated that In11 response is restricted to the Phaseoloids (Fig. 1). However, within the  
231 Phaseoloids, several tested species/accessions were not able to respond to In11, suggesting  
232 multiple independent losses of INR. These phenotypic observations allowed the investigation of  
233 the evolution of a specific LRR-RLP involved in plant immunity over a long (32my), high-resolution  
234 timescale.

235 We complemented broad phenotypic analysis with comparative genomics of key legume species.  
236 Analysis of the *INR* receptor locus across twenty existing and newly sequenced legume genomes  
237 revealed that INR function followed an early gene insertion and diversification at the *INR* locus.  
238 Importantly, *de novo*, long-read based assemblies presented here contained contiguous *INR* loci  
239 flanked by conserved anchor genes (Fig. 2), enabling strong conclusions with respect to receptor  
240 gene content. Comparative genomic analysis can reveal complex histories of gene insertions,  
241 duplication and losses for LRR-RKs/RLPs<sup>50,51</sup>. The *INR* locus shows high variability and  
242 diversification among legumes of the NPAAA papilionoids, with zero to seven LRR-RLP encoding-  
243 genes per species. Legume species within the Hologalegina (*L. angustifolius*, *C. arietinum*, *M.*  
244 *truncatula* and *T. pratense*) do not contain an LRR-RLP encoding gene at the locus, whereas all  
245 species investigated herein the Millettoids except for *P. erosus* contain at least one LRR-RLP  
246 (Fig. 2). This observation is consistent with a gene insertion event at the *INR* locus in the ancestor  
247 of extant Millettoids ca 32 mya.

248 Our analysis of INR provides an example of an LRR-RLP gene family with conserved recognition  
249 function across multiple plant genera which evolved ~28 mya. A phylogenetic analysis revealed  
250 potential INR-homologues in ten additional species as they clustered together with *V. unguiculata*  
251 INR. Orthologous LRR-RLPs of the *INR* clade from five legume genera were tested and able to  
252 induce an In11-induced ethylene and ROS burst upon heterologous expression in *N.*  
253 *benthamiana* (Fig.3, Suppl. Fig. 3). This includes INR homologues from *Cajanus cajan* and *M.*  
254 *pruriens* of the Phaseoloid clade. Certain Phaseoloids and earlier diverged non-Phaseoloids also  
255 contain INR-like homologues at the contiguous *INR* locus; thus, INR most likely arose from an  
256 existing LRR-RLP, ~28 mya ago. This evolutionary pattern contrasts with the evolution of the  
257 *Solanum pimpinellifolium* specific LRR-RLP Cf-2 which evolved <6 mya, potentially by intergenic  
258 recombination<sup>49</sup>. Our analysis thus identifies an alternative mechanism whereby an ancestral  
259 gene insertion event is the likely source of extant gene and copy number variation, preceding the  
260 evolution of a specific peptide recognition function.

261 The abundance of closely related legume genomes facilitates gene-species tree reconciliation,  
262 suggesting mechanisms contributing to the dynamic nature of *INR* receptor loci<sup>43,50</sup>. Interestingly,  
263 we observed three independent cases of *INR* loss within the Phaseoloids. Two reference  
264 genomes as well as 26 *de novo* assemblies of the closely related Glycininae, *G. soya* and *G.*  
265 *max*, do not encode *INR*. Nevertheless, *INR* loss does not seem to predate the divergence of the  
266 Glycininae as *Teramnus labialis* is able to respond to In11 (Fig. 1), although genome data are  
267 lacking for this species. Besides reciprocal gene loss of *INR*, gene tree-species tree reconciliation  
268 also suggests the involvement of five tandem duplications of an *INR*-like gene predating radiation  
269 of the genus *Glycine* (Suppl. Fig. 2). This is consistent with whole-genome observations of  
270 preferential gene loss in tandem clusters<sup>50</sup>. Similarly, within the separate Desmodieae lineage,  
271 our analysis also predicts that a *H. podocarpum* *INR*-like gene underwent specific tandem  
272 duplication events after the loss of *INR*, as its genome contains seven *INR*-like homologues which  
273 cluster together in a phylogenetic analysis. In contrast, *P. erosus* seems to have lost both *INR*  
274 and *INR*-like as it does not contain any complete coding sequence of an LRR-RLP at the *INR*  
275 locus. Besides *P. erosus*, *P. vulgaris* and *M. pruriens* also lost *INR*-like. Loss of *INR* (and *INR*-  
276 like) may reflect the propensity of tandemly duplicated loci to lose functions through gene  
277 conversion, and/or reciprocal gene loss<sup>50</sup>.

278 Our high-resolution analysis of the emergence of *INR* provides a roadmap for understanding other  
279 lineage-specific PRRs to detect PAMPs. While most characterized LRR-RLPs are family-  
280 specific<sup>17,26</sup>, extensive phenotyping of an entire plant family has not yet been conducted for well-  
281 studied PAMPs such as elf18, nlp20, pg9, crip21, csp22, and xup25. Understanding the  
282 emergence of known LRR-RK/RLPs for these PAMPs, namely EFR, RLP23, RLP42, CORE,  
283 CuRE1, and XPS1 will illuminate broader mechanisms underlying the evolution of key immune  
284 receptor modules in plants<sup>26,27,29,52,53</sup>. LRR-RLPs often occur in complex loci with variation within  
285 and between species<sup>17,26</sup>. However, a recent pangenomic analysis of Arabidopsis indicates that  
286 several PAMP sensing LRR-RLPs occur in relatively simple and conserved loci across *A. thaliana*  
287 varieties<sup>16</sup>. It will be interesting to see if Arabidopsis PRR functions evolved along a similar  
288 trajectory to *INR*, for example via ancestral duplications preceding fixation in the Arabidopsis  
289 lineage. In summary, additional case studies for specific receptors are needed to reveal broader  
290 patterns in receptor evolution.

291 Our functional analysis of *INR* and *INR*-like genes in a heterologous model (*N. benthamiana*) also  
292 provides a system to study LRR-RLP function. Compared to well-studied LRR-RKs such as  
293 FLAGELLIN-SENSING 2 (FLS2)<sup>54-56</sup>, mechanisms underlying LRR-RLP function are not well  
294 understood. Despite multiple intense attempts, and in contrast to LRR-RKs<sup>10,56</sup>, structural  
295 information for ligand-binding LRR-RLPs is not available, including *INR*<sup>26,35</sup>. Moreover, Wang et  
296 al. 2019 contrasted signaling and defense responses activated by FLS2 and RLP23, but broader  
297 similarities and differences between RK and RLP families remain unclear<sup>35,57</sup>. Consequently, we  
298 have limited mechanistic insight into LRR-RLP function as elicitor-specific PRRs<sup>26,35</sup>.

299 Chimeric receptors formed by combining *INR* and an *INR*-like paralogue revealed RLP  
300 subdomains required for In11 response. Across all chimeric receptors, those encoding the LRR  
301 (C1) and intervening motif (C2) domains of *VuINR* responded to In11 treatment with both an  
302 ethylene and ROS burst, suggestive of crucial elements for elicitor interaction in the C1-C2  
303 subdomain. Notably, a chimeric receptor with mixed C1 and C2 (intervening motif), 219600-C1,  
304 resulted in In11-independent autoactivity, consistent with a critical role for C1-C2 compatibility. In  
305 addition, a chimeric receptor with mixed C2 and C3 (219600-C2) had delayed In11-induced ROS

306 burst relative to all other In11-responsive constructs tested here (Fig. 4). These findings are  
307 consistent with previous truncation and chimeric protein analyses for Arabidopsis RLP23 and  
308 RLP42. Truncations of the RLP23 ectodomain abolished function, suggesting the necessity of the  
309 entire ectodomain for elicitor binding or proper assembly of the receptor<sup>35</sup>. Additionally, chimeric  
310 receptors implicated the importance of RLP42 its twelve N-terminal LRRs (C1) and LRR21-LRR24  
311 which includes the island subdomain (C2) for recognition of fungal endopolysaccharidases<sup>26</sup>.

312 Additionally, our chimeric receptor data are consistent with a vestigial role for the cytoplasmic tail  
313 of PRRs in the LRR-RLP family. Strikingly, all identified INR homologues encode a cytoplasmic  
314 tail of only 10AA, shorter relative to all identified INR-like homologues here. Nevertheless,  
315 swapping the *Vu*INR (*Vigun07g219600*) cytoplasmic tail to the extended version of *Vu*INR-like 1  
316 (*Vigun07g219700*), 219600-F, did not affect In11-response (Fig. 4). Previously, the complete  
317 deletion of the intracellular 17-amino-acid tail of RLP23 reduced but did not abolish receptor  
318 function<sup>35</sup>. Additionally, a previously described chimeric swap replacing the RLP42 terminal LRR,  
319 transmembrane helix and cytoplasmic tail with the respective subdomains of a non-responsive  
320 paralogue was still responsive to the pg9(*At*) elicitor<sup>26</sup>. Intriguingly, quantitative differences were  
321 earlier reported as the C-terminally truncated RLP23 had a reduced nlp20 response, consistent  
322 with auxiliary rather than essential function for the RLP23 cytoplasmic tail<sup>35</sup>.

323 As an alternative to the use of chimeric receptors, ASR of the *INR* LRR domain revealed additional  
324 detailed insights contributing to INR function. To trace the potential evolutionary history of INR,  
325 we used ASR by leveraging *INR* and *INR*-like homologues of sixteen legume species of the  
326 Millettoids (Suppl. Fig. 5). As the chimeric receptors implicated the LRR (C1-3) ectodomain in  
327 In11 recognition, we reconstructed ancestral LRR variants in an *INR* backbone. Our analysis  
328 suggests that the common ancestral LRR ectodomain of extant INRs conferred In11 response  
329 (N4), whereas the common ancestor of both INR and INR-like (N3) did not confer In11 response  
330 (Fig. 5). N3 and N4 differ in In11 response although they only vary by 16 AA, with only some of  
331 them conserved in all extant INRs. The role of key LRR-RLP residues in ligand-specific responses  
332 is consistent with the previous analysis of Arabidopsis RLP42. Zhang et al. 2021 introduced single  
333 AA substitutions to the functional RLP42 receptor, and several were sufficient to abolish pg9(*At*)-  
334 induced co-receptor association and defense responses.

335 A similar ASR approach to ours was employed to understand the 98-AA heavy metal-associated  
336 (HMA) domain of the plant intracellular NOD-like receptor Pik-1<sup>37</sup>. Specific AA changes introduced  
337 into an ancestrally reconstructed backbone were sufficient to confer effector binding and immune  
338 functions. For Pik-1 HMA, structural data provided additional insight into the mechanism of  
339 effector binding in ancestral and extant proteins. Our use of an ASR approach for a relatively long  
340 LRR domain (720 AA) now demonstrates the power of dense comparative genomic analyses to  
341 also identify key residues in extant PRRs without defined binding sites. In the absence of structural  
342 data for ligand-binding LRR-RLPs, an ASR approach may be useful to identify sets of co-varying  
343 residues critical for binding and signaling functions.

## 344 **Materials and Methods**

### 345 **Plant materials**

346 Plant species and accessions used in this study are listed in Suppl. Table 1, as well as their  
347 respective providers: Phil Miklas, (US Department of Agriculture, Prosser, WA), Creighton Miller  
348 (Texas A&M University, College Station, TX), Phil Roberts (UC Riverside, CA), Timothy Close



349 (UC Riverside, CA) and the USDA Germplasm resources Information network (GRIN). Plants  
350 were grown in the greenhouse (25°C/21°C day/night, 60%RH and 12:12 light:dark cycles) or in  
351 growth chambers (26°C/26°C day/night, 70%RH and 12:12 light:dark cycles).

### 352 Peptide-induced ethylene production in legume species.

353 The In11 peptide (ICDINGVCVDA) is a host derived proteolytic fragment of the ATP synthase  $\gamma$ -  
354 subunit (cATPC), based on the *V. unguiculata* cATPC sequence<sup>32</sup>. The flg22 peptide  
355 (QRLSTGSRINSAKDDAAGLQIA) originates from bacterial flagellin<sup>58</sup>. Both peptides were  
356 synthesized (Genscript) and reconstituted in H<sub>2</sub>O. Leaflets were lightly scratch wounded with a  
357 fresh razor blade to remove cuticle area, and 10  $\mu$ L of H<sub>2</sub>O with or without peptide (1  $\mu$ M) was  
358 equally spread over the wounds with a pipette tip. After 1h, leaflets were excised and placed in  
359 sealed tubes for 2h before headspace sampling (1 mL). Ethylene was measured as previously  
360 described with a gas chromatographer (HP 5890 series 2, supelco #13018-U, 80/100 Hayesep Q  
361 3FT x 1/8IN x 2.1MM nickel) with flame ionization detection and quantified using a standard curve  
362 (Scott, 99.5% ethylene, (Cat. No 25881-U)) (Suppl. Table 2)<sup>59</sup>. Subsequently, R (v4.0.3) and the  
363 R-packages dplyr (v1.0.7), ggpubr (v.0.4.0) and ggplot2 (v3.3.3) were used to analyze and plot  
364 the data, statistics were performed by using the paired Wilcoxon signed-rank test<sup>60-62</sup>. The  
365 resulting figure was edited in Corel-DRAW Home & Student x7.

### 366 ROS production in legumes

367 Leaf punches were taken with a 4-mm biopsy punch and floated in 150  $\mu$ L of H<sub>2</sub>O using individual  
368 cells of a white 96-well white bottom plate (BRANDplates F pureGrade S white (REF 781665)).  
369 After overnight incubation, ROS production was measured upon addition of a 100  $\mu$ L assay  
370 solution which contains 10 $\mu$ g/ml luminol-horseradish peroxidase (HRP), 17 $\mu$ g/ml luminol and the  
371 treatment (2.5  $\mu$ M In11, 2.5  $\mu$ M flg22 or H<sub>2</sub>O). Luminescence was quantified with a TECAN  
372 SPARK plate reader every minute for an hour using an integration time of 500ms. Four technical  
373 replicates were quantified for each treatment and significant differences were determined by  
374 performing a 2-group Mann-Whitney U Test between both treatments. R and the R-packages  
375 dplyr (v1.0.7), ggpubr (v.0.4.0) and ggplot2 (v3.3.3) were used to analyze and plot the data. The  
376 resulting figure was edited in Corel-DRAW Home & Student x7.

### 377 Genome sequencing and assembly of legume species

378 Leaf tissue of legume plants was harvested and grounded using an N<sub>2</sub>-chilled mortar and pestle.  
379 In contrast to *P. erosus*, nuclei isolation was first performed on frozen tissue for *C. ensiformis*, *C.*  
380 *tetragonoloba* and *H. podocarpum* using the Bionano Plant Tissue Homogenization Buffer (Part  
381 number 20283). Nuclear DNA was extracted for all above mentioned species with a modified  
382 CTAB protocol as described previously<sup>63</sup>. Resultant High-Molecular Weight (HMW) DNA  
383 concentrations were determined by Qubit and Bioanalyzer.

384  
385 A modified protocol using the Oxford Nanopore Technologies (ONT) Rapid barcoding kit (SQK-  
386 RBK004) was used for sequencing. Briefly, 27 $\mu$ L of ~20 ng/ $\mu$ L HMW DNA was combined with 3 $\mu$ L  
387 of Rapid Barcoding fragmentation mix and incubated for 1min at 30°C followed by 1 min at 80°C.  
388 Ampure beads were added at a 0.7x final concentration and bead clean-ups performed as  
389 described in the Rapid barcoding kit (SQK-RBK004). All remaining steps were performed as  
390 described in the Rapid barcoding kit protocol. Each sample was sequenced on a single MinION  
391 or PromethION flowcell (R9.4). High-accuracy base calling was performed in real time with  
392 MinKnow (v20.10.6).

393 Illumina short read sequence was generated for *C. tetragonoloba* and *H. podocarpum* from the  
394 same HMW DNA used for ONT long read sequencing. Paired end 2x150 bp sequence was  
395 generated on the Illumina NovaSeq6000 platform. In addition, we generated Illumina short reads  
396 for *C. ensiformis*, *P. erosus* and *M. lathyroides*, with GENEWIZ. For these samples, genomic DNA  
397 was extracted using the Nucleospin Plant II kit (Macherey-Nagel). The Oxford Nanopore  
398 sequencing data and Illumina HiSeq reads used in this study can be found in SRA under  
399 Bioproject: PRJNA820752. The final genome assemblies are available on NCBI (*P. erosus*:  
400 SUB11200654, *C. ensiformis*: SUB11200580, *H. podocarpum*: SUB11200652 and *C.*  
401 *tetragonoloba*: SUB11200669).

402 The *P. erosus* genome was assembled using SPAdes (v3.15.4) using the `-meta` option with both  
403 the Illumina and Nanopore readsets. Additional genome assemblies were produced with FlyE  
404 (v2.8.1), consensus was generated with three rounds of Racon (v1.3.1), and finally polished with  
405 Pilon (v1.22) three times with Illumina reads (2x150 bp). Final assembly quality was determined  
406 with assembly-stats and BUSCO (v5.3.0).

#### 407 Analysis of the contiguous *INR* locus and LRR-RLP homologues

408 The analyzed genome assemblies, versions and their sources for the twenty legume species  
409 included in the contiguous *INR* locus analysis can be found in Suppl. Table 3<sup>64-71</sup>. The nucleotide  
410 sequences of the extracted loci and their coordinates can be found respectively in Suppl. File 1  
411 and Suppl. Table 3. All *INR* and *INR*-like AA sequences included in the phylogenetic analysis can  
412 be found in Suppl. File 2. Newly sequenced and assembled genomes were analyzed to define  
413 the contiguous *INR* locus, *INR* and *INR*-like sequences. Similarly, if not yet annotated in publicly  
414 available genomes, syntenic *INR* and *INR*-like homologues were identified. First, BLASTN  
415 (BLAST 2.9.0+, e-value 10) was used to identify the *INR* syntenic locus by mining the genomes  
416 for homologues of the strongly conserved neighbor (anchor) genes of common bean *INR*  
417 (Phvul.007g077500); Phvul.007g077400 and Phvul.007g077600. Similarly, the genomes were  
418 mined for LRR-RLPs via BLASTN approach with a default e-value of 10, with exception of the  
419 *Glycine* pangenome where a BLASTP approach was used. The strongest LRR-RLP blast hits  
420 with *INR* were consistently identified in between the conserved neighbor genes. Finally, potential  
421 *INR* and *INR*-like ORFs were determined by visual inspection in IGV (v2.10.3) and compared with  
422 the sequences of closely related annotated LRR-RLPs in other legume species. Additionally, *INR*  
423 homologues were identified in *Macroptilium lathyroides* by using an alternative method. First, *M.*  
424 *lathyroides* Illumina HiSeq paired end reads were mapped against both *Phvul.007G077500* (*INR*)  
425 and *PvUI111.07G078600* (*INR*-like) by using `bwa` (v0.7.17-r1188)<sup>72</sup>. Second, mapped reads were  
426 sorted and indexed by using `samtools` (v 1.13)<sup>73</sup>. Third, IGV (v2.10.3) was used to inspect the  
427 mapped reads and identify the SNPs of *M*lathy *INR* and *INR*-like in comparison to the *P. vulgaris*  
428 homologues. Fourth, the above three steps were reiterated with the newly acquired gene  
429 sequences. Finally, the acquired *M*lathy *INR* and *INR*-like sequences were confirmed by PCR  
430 using the Q5 Hot Start High-Fidelity kit (NEB), enzymatic clean-up using ExoSAP-IT™ (Thermo  
431 Fisher scientific) and Sanger sequencing of the entire amplified PCR product (GENEWIZ).  
432 Primers used in this process are listed in Suppl. Table 5.

#### 433 Contiguous *INR* locus analysis and validation of *P. erosus* receptor disruption

434 Locus comparison was performed using R (v4.0.3) and the R-package `genoPlotR` (v0.8.11) using  
435 the extracted contiguous *INR* loci and their corresponding annotation (Suppl. File 1). The resulting  
436 figure was edited in Corel-DRAW Home & Student x7. A PCR was performed to validate the  
437 disruption of the receptor at the syntenic locus of *P. erosus* using the Q5 Hot Start High-Fidelity

438 kit (NEB). Primers used in the reaction are listed in Suppl. Table 5. Subsequently, the amplified  
439 PCR product was enzymatically cleaned-up using ExoSAP-IT™ (Thermo Fisher scientific).  
440 Finally, the disruption was validated by Sanger sequencing of the entire amplicon (GENEWIZ).

#### 441 Phylogenetic analysis of *INR* and *INR-like* homologues

442 Sequences were aligned using the online version of MAFFT 7 using the E-INS-i strategy<sup>74</sup>. One  
443 potential pseudogene of *H. podocarpum* was not incorporated in the phylogenetic analysis since  
444 the length of the sequence was about 79% of cowpea *INR* due to the absence of a part of the  
445 LRR domain in comparison to all other annotated receptors at the contiguous *INR* locus. A  
446 phylogenetic analysis was performed on the CIPRES web portal using RAXML-HPC2 on XSEDE  
447 (v8.2.12) with the automatic protein model assignment algorithm using maximum likelihood  
448 criterion and 250 bootstrap replicates<sup>75,76</sup>. The DUMMY2 protein model was selected as the best  
449 scoring model for maximum likelihood analysis. The resulting tree was rooted, visualized using  
450 MEGA10 and edited in Corel-DRAW Home & Student x7.

#### 451 Notung analysis: prediction of duplication and gene loss events at the contiguous *INR* 452 locus

453 First, a phylogenetic analysis was performed similar to the approach above with the sole  
454 difference that only *INR* and *INR-like* homologues located at the contiguous *INR* locus were  
455 included. Second, a species tree in Newick format was built which includes all species of which  
456 1) *INR* and *INR-like* homologues were extracted, 2) *C. tetragonoloba* as it is the closest related  
457 legume species without a receptor at the contiguous *INR* locus, and 3) *M. truncatula* as the LRR-  
458 RLP used as an outgroup in the analysis was extracted from its genome. Third, the NOTUNG  
459 analysis was performed using the default options, including a duplication cost of 1.5 and a loss  
460 cost of 1 (v2.9.1.5)<sup>43</sup>. NOTUNG ignores incomplete lineage sorting as an evolutionary mechanism  
461 when both a rooted species and gene tree are used as input, as was the case for the present  
462 study.

#### 463 Molecular cloning of *INR* and *INR-like* homologues

464 Leaf tissue of legume plants was harvested and grounded using an N<sub>2</sub>-chilled mortar and pestle.  
465 Genomic DNA was extracted using the Nucleospin Plant II kit (Macherey-Nagel). RNA was  
466 extracted using the Nucleospin RNA Plant kit (Macherey-Nagel). cDNA was created using  
467 SuperScript™ IV Reverse Transcriptase (Invitrogen). All constructs were created using a  
468 hierarchical modular cloning approach facilitated by the MoClo toolkit and the MoClo Plant Parts  
469 kit<sup>77,78</sup>. LRR-RLPs with no introns were PCR amplified from genomic DNA (Q5 Hot Start High-  
470 Fidelity, NEB), all others (*Phvul.007g246600* and *Vigun07g039700*) were amplified from cDNA.  
471 All primers used for amplification are listed in Suppl. Table 5. All amplified PCR fragments were  
472 gel extracted using the PureLink™ Quick Gel Extraction Kit (Thermo Fisher scientific) and purified  
473 and concentrated using the Monarch PCR & DNA Cleanup Kit. Subsequently, the PCR fragments  
474 were ligated in an L-1 acceptor vector. A second digestion/ligation step was completed, to ligate  
475 multiple parts together and complete the CDS while inserting it in an L0 acceptor vector.  
476 Throughout the previous steps, recognition sites for BsaI and/or BpiI were removed from the CDS.  
477 All constructs were validated by Sanger sequencing upon completion. Finally, all constructs were  
478 completed by adding the following MoClo modules; 35s Cauliflower Mosaic Virus + 5'UTR  
479 Tobacco mosaic virus (pICH51266), GFP (*A. victoria*) (pICSL50008) and the OCS1 terminator  
480 (pICH41432)<sup>78</sup>.

#### 481 *N. benthamiana* transient expression and Western blotting

482 Constructs were electroporated into *Agrobacterium tumefaciens* strain GV3101(pMP90,pSOUP).  
483 Overnight cultures were resuspended in 150  $\mu$ m acetosyringone in 10 mM 2-(*N*-morpholino)  
484 ethanesulfonic acid (MES), pH 5.6, 10 mM MgCl<sub>2</sub>. After 3h of incubation at room temperature, *N.*  
485 *benthamiana* leaves of 5-week-old plants were infiltrated at an optical density of 0.45 at 600 nm  
486 (OD<sub>600</sub>).

487 Leaf punches were taken 48h after infiltration of the *N. benthamiana* leaves to validate the  
488 expression of the constructs in *N. benthamiana* by Western blot (Suppl. Fig. 4). Ground, frozen  
489 tissue was homogenized in a 3x lamellae buffer (50 mM Tris-Cl pH 6.8, 6% SDS, 30% glycerol,  
490 16%  $\beta$ -mercaptoethanol and 0.006% Bromophenol blue) and then cleared by centrifugation (10  
491 m, 20,000 rcf). Subsequently, proteins in the supernatant were separated by performing an SDS-  
492 PAGE on an 8% acrylamide gel. Finally, a Western blot was performed to visualize the GFP-  
493 tagged heterologously expressed proteins and actin as a loading control with respectively an  $\alpha$ -  
494 GFP polyclonal (A-6455; Thermo) primary antibody at a 1:2,000 dilution and an anti-Actin  
495 (ab197345, abcam) primary antibody at a 1:5,000 dilution.  $\alpha$ -rabbit (A6154; Sigma) was used as  
496 a secondary antibody for both at 1:10,000 dilution.

#### 497 ROS measurements in *N. benthamiana*

498 Following *Agrobacterium* infiltration for receptor expression (24 h), leaf punches were taken with  
499 a 4-mm biopsy punch and floated in 150  $\mu$ L of H<sub>2</sub>O using individual cells of a white 96-well white  
500 bottom plate (BRANDplates F pureGrade S white). Subsequently, the same procedure was  
501 followed as outlined for ROS production in legumes. Four biological replicates were quantified  
502 (n=4 plants), with each biological replicate representing six technical replicates. R and the R-  
503 packages dplyr (v1.0.7), ggpubr (v.0.4.0) and ggplot2 (v3.3.3) were used to analyze and plot the  
504 data. The resulting figure was edited in Corel-DRAW Home & Student x7.

#### 505 Ethylene in *N. benthamiana*

506 For ethylene assays in *N. benthamiana*, a fully expanded leaf of 5wk-old plants was infiltrated  
507 with H<sub>2</sub>O or 1 $\mu$ M In11 with a blunt syringe. Subsequently, four leaf discs within the infiltrated area  
508 were immediately excised with a no. 5 cork borer and sealed in tubes<sup>31</sup>. Headspace ethylene was  
509 measured after 3 h of accumulation as described above. Subsequently, R and the R-packages  
510 dplyr (v1.0.7), ggpubr (v.0.4.0) and ggplot2 (v3.3.3) were used to plot the data and perform the  
511 statistics (paired Wilcoxon signed-rank test). The resulting figure was edited in Corel-DRAW  
512 Home & Student x7.

#### 513 Construction of chimeric receptors.

514 Chimeric LRR-RLP constructs were generated using the MoClo toolkit<sup>77</sup>. MoClo overhangs were  
515 designed in such a way that specific fragments amplified from the L0 constructs of  
516 *Vigun07g219600* and *Vigun07g219700* could be ligated in the preferred direction and order in an  
517 L0 vector. Primers used in these reactions are listed in Suppl. Table 5. All constructs were  
518 validated by Sanger sequencing upon completion. Subsequently, CDS stored in L0 universal  
519 acceptors were combined with the same MoClo modules as the earlier described LRR-RLP  
520 constructs mentioned above to create a complete L1 construct. Transient expression of chimeric  
521 receptor constructs in *N. benthamiana* was validated with western blot.

## 522 ASR of LRR domain

523 The LRR (C1-3 domain, Fig. 4) were extracted from all LRR-RLP sequences included in the earlier  
524 mentioned phylogenetic analysis (Fig. 3, Suppl. File 4). The LRR domain and subdomains of  
525 *Vu*INR were earlier identified using LRRfinder<sup>31,79</sup>. Phylogenetic trees were built using MEGA X  
526 software<sup>80</sup>, and bootstrap method based on 1000 iterations. A codon-based 2172-nucleotide-long  
527 alignment was generated using MUSCLE<sup>81</sup>. NJ clustering method was used for constructing the  
528 codon-based tree on Maximum Composite Likelihood substitution models. The ML tree was  
529 calculated using the GTR+G+I submodel as implemented in MEGA X software<sup>80</sup>. The resulting  
530 ML tree was used for the ASR of selected nodes of interest. Joint and marginal ASR were  
531 performed with FastML software using Jukes and Cantor substitution model for nucleotides,  
532 gamma distribution, and 90% probability cutoff<sup>82</sup>. Finally, the sequences were domesticated to  
533 facilitate MoClo cloning by removing the Bsal and Bpil cut sites (Suppl. File 4).

## 534 Construction of receptors with an ancestral reconstructed LRR domain

535 Ancestral reconstructed LRR-RLP constructs were generated using the MoClo toolkit<sup>77</sup>. MoClo  
536 overhangs were designed in such a way that the AB domain and the DEFG domain amplified  
537 from *Vigun07g219600* could be ligated with the synthesized ancestral reconstructed LRR domain  
538 (C domain), resulting in an L0 vector. Primers used in these reactions are listed in Suppl. Table  
539 5. All constructs were validated by Sanger sequencing upon completion. Subsequently, the  
540 complete CDS stored in L0 acceptors were combined with the same MoClo modules as the earlier  
541 described LRR-RLP constructs mentioned above to create a complete L1 construct. Transient  
542 expression of the ancestral reconstructed LRR-RLPs in *N. benthamiana* was validated with  
543 western blot.

## 544 Acknowledgments

545 S.S. is supported as a Belgian American Educational Foundation postdoctoral fellow and the  
546 Mary Race Bevis Postdoc Research Award. S.S. and A.D.S. are supported by start-up funding  
547 from the University of Washington. A.D.S. is a Distinguished Investigator of the Washington  
548 Research Foundation.

## 549 Contributions

550 S.S. and A.D.S. conceived and designed the experiments; S.S., B.W.A and A.G.K.G. conducted  
551 experiments; S.S, B.W.A., A.N.E and A.D.S. analyzed data; S.S. prepared all figures; S.S. and  
552 A.D.S. wrote the manuscript. All authors discussed the results and commented on the  
553 manuscript.

554 Main figures

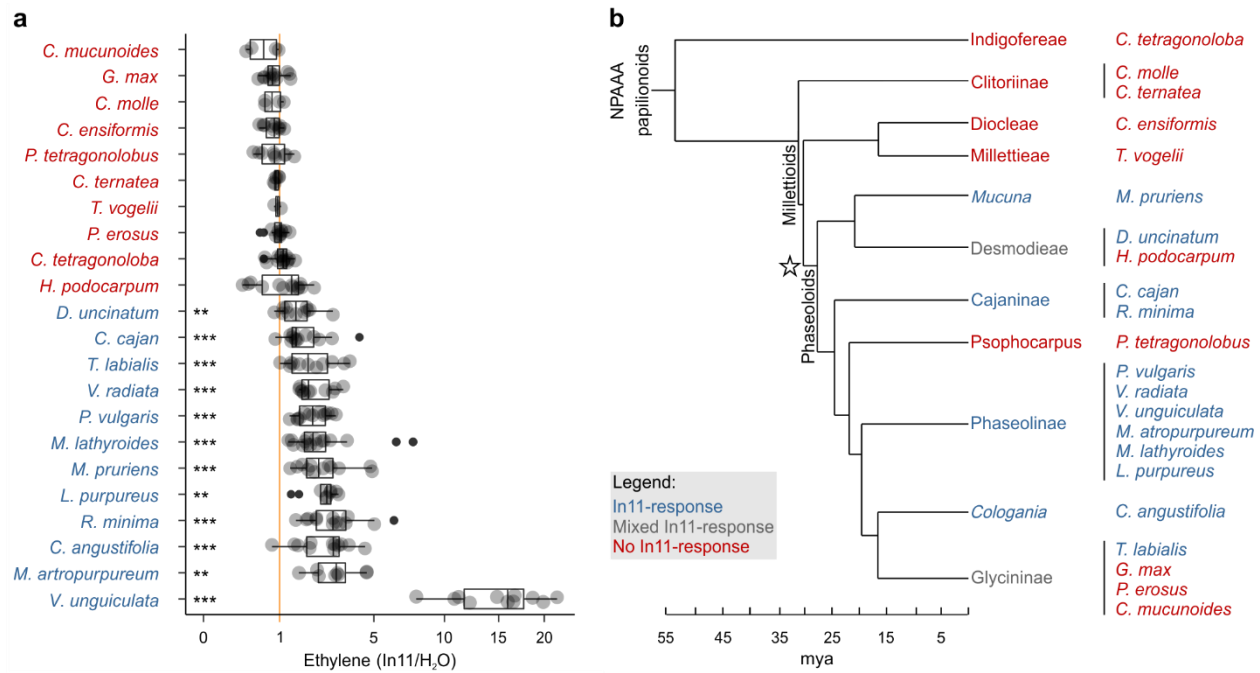

555

556 **Fig. 1: Induced ethylene response to In11 is limited to Phaseoloid legumes.** **A)** Individual trifoliolate  
557 leaflets were scratch wounded and treated with 1  $\mu$ M In11 or H<sub>2</sub>O. The ratio of ethylene production for  
558 leaflets within the same leaf is shown (x-axis). The vertical orange line shows a ratio equal to one, *i.e.* no  
559 In11-induced ethylene burst. Biologically replicated plants are shown as separate dots. Significant  
560 differences between the control and the treatment of interest are indicated (paired Wilcoxon signed-rank  
561 test; ns non-significant, \*  $p \leq 0.05$ , \*\*  $p \leq 0.01$  and \*\*\*  $p \leq 0.001$ ). Plant species names are colored blue  
562 (significant response to In11) or red (insignificant response). Species/accessions and resulting response  
563 data can respectively be found in Suppl. Table 1 and Suppl. Table 2. **B)** A summary chronogram  
564 representing time-based phylogenetic relationships within the tested lineages, with colors representing In11  
565 response phenotypes as in (A). The star symbol indicates the node containing all In11-responsive species  
566 at the base of Phaseoloid legumes. Divergence time is shown in million years ago (mya) and represents a  
567 composite average<sup>83–86</sup>.

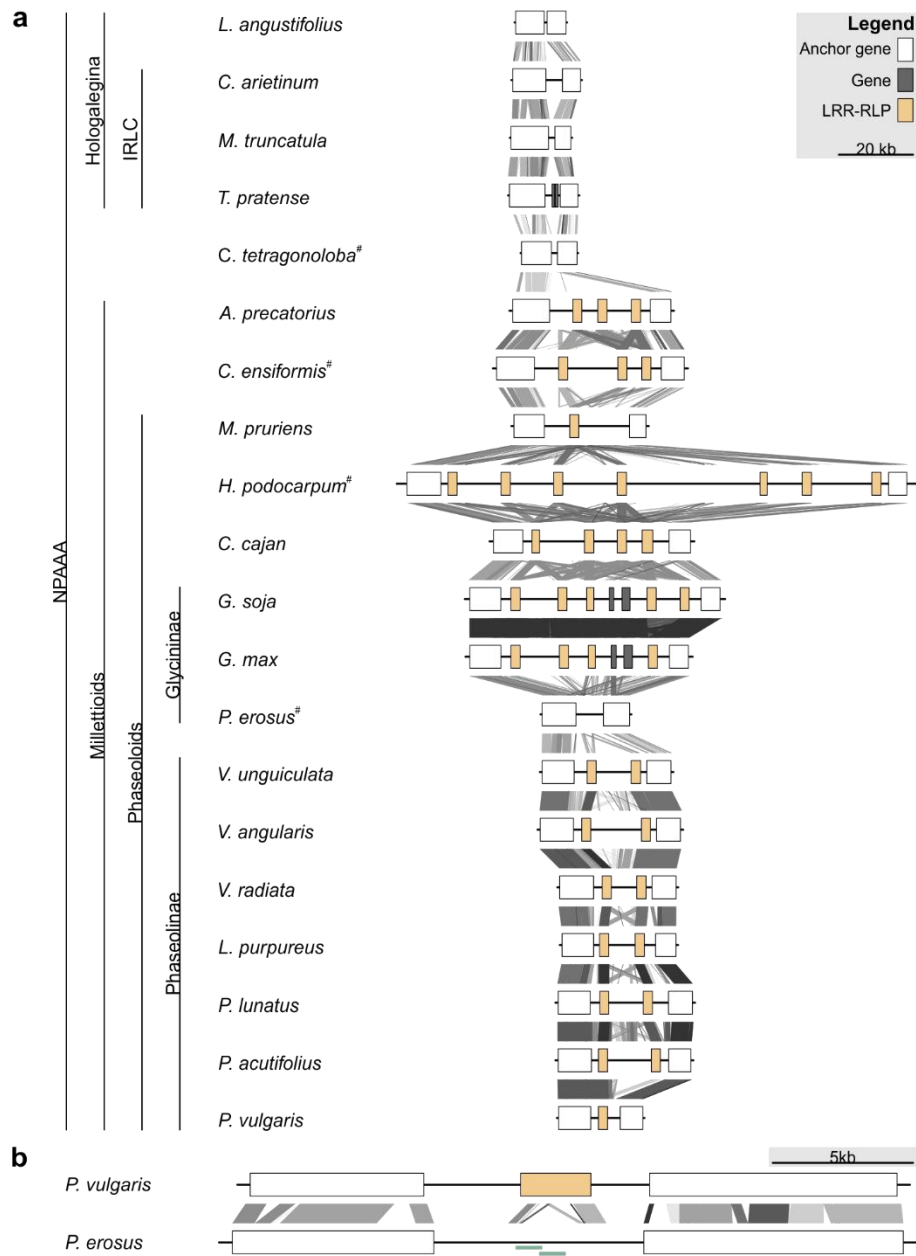

568

569 **Fig. 2: LRR-RLP copy number variation at the *INR* locus in Millettoid and non-Millettoid legume**  
 570 **genomes.** Anchor, LRR-RLP, and other genes are colored as per legend. **A)** Locus comparison of the  
 571 contiguous *INR* locus of twenty NPAAA papilionoid species. Blast hits between loci are indicated with lines  
 572 (e-value < 1e-04) with score according to grayscale gradient, with darker grays indicating higher similarity.  
 573 Genes are labeled LRR-RLP if a complete coding sequence is present ( $\geq 875$  AA). Species names followed  
 574 by superscript (#) were newly sequenced and assembled for this project. **B)** Locus comparison of the  
 575 contiguous *INR* locus of *P. vulgaris* and *P. erosus*. *P. vulgaris* has a functionally validated *INR* homologue  
 576 (LRR-RLP)<sup>31</sup>, while *P. erosus* lacks a full-length LRR-RLP. The disruption of the *P. erosus* LRR-RLP was  
 577 validated by PCR followed by Sanger sequencing as indicated with light green bars.

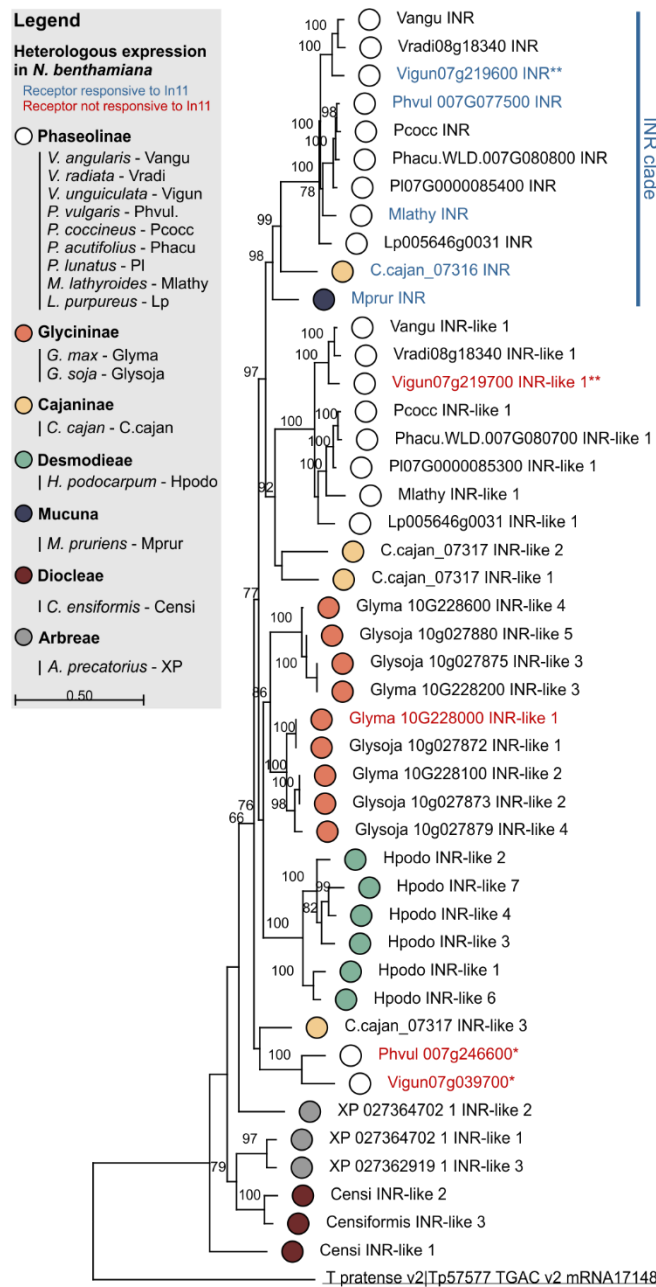

578

579 **Fig. 3: Phylogenetic analysis of LRR-RLPs at the contiguous *INR* locus reveals a clade of functional**  
 580 **receptors.** LRR-RLPs from sixteen Millettoid species are shown. Maximum likelihood analysis bootstrap  
 581 values are indicated, only values higher than 65 are shown. The scale bar represents 0.5 AA substitutions  
 582 per site. Filled dots indicate species of origin according to legend, where different colors indicate different  
 583 subtribes. A *T. pratense* LRR-RPL was used as an outgroup to root the phylogenetic gene tree and is  
 584 underlined. The functionally validated INRs of *P. vulgaris*, *V. unguiculata*, *M. lathyroides*, *C. cajan* and *M.*  
 585 *pruriens* are highlighted in blue as they confer induced ROS and ethylene functions in response to In11  
 586 upon heterologous expression in *N. benthamiana* (Suppl. Fig. 3). These five validated INRs fall within the  
 587 labelled “INR clade”. Heterologously expressed receptors which were not responsive to In11 are highlighted  
 588 in red (Suppl. Fig. 3). One asterisk (\*) highlights the LRR-RLPs which are not part of a contiguous *INR*  
 589 locus. Two asterisks (\*\*) highlight the LRR-RLPs used to create the chimeric receptors.



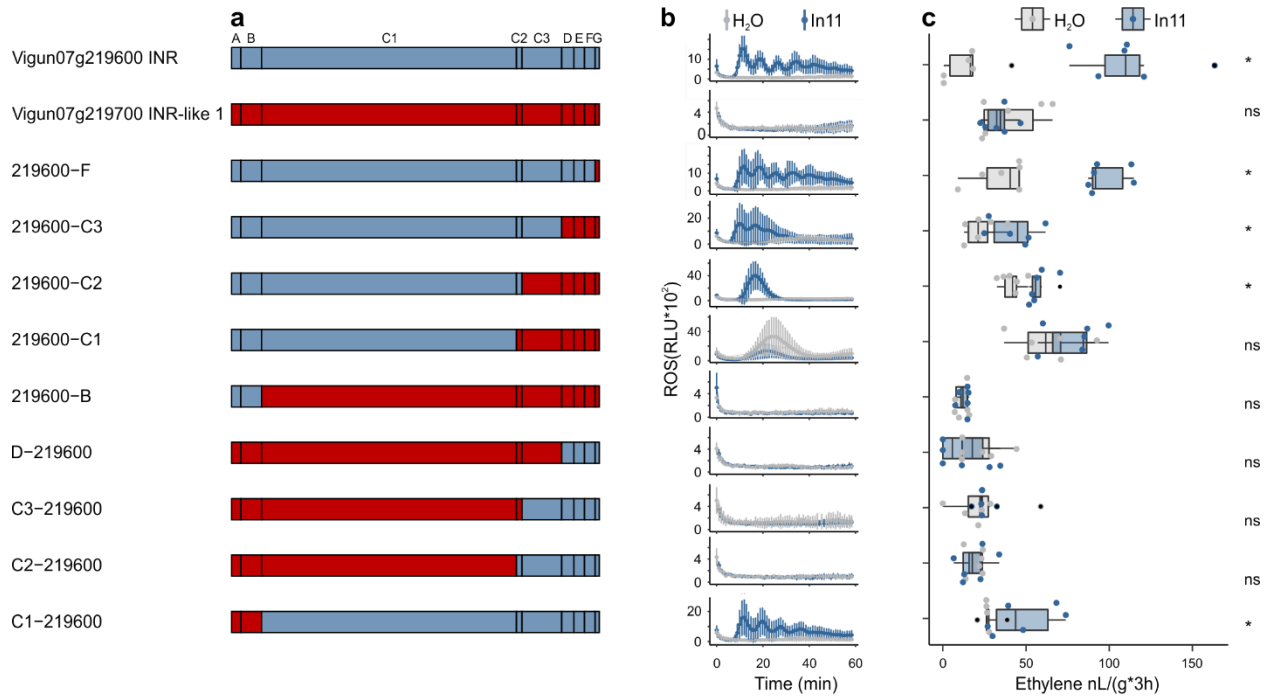

590

591 **Fig. 4: Chimeric receptors indicate that the C1 and C2 subdomains mediate INR recognition**  
 592 **function.** **A**) Schematic representation of *Vigun07g219600* (blue, *Vu*INR), *Vigun07g219700* (red, *Vu*INR-  
 593 like) and the nine created chimeric receptors used for structure-function analysis. Subdomains were earlier  
 594 described by Fritz-Laylin *et al.* 2005; A: putative signal peptide, B: one or two pairs of Cys that may play  
 595 structural roles, C: multiple LRRs with an intervening motif (C2) inserted, D: linker domain, E: acidic domain,  
 596 F: transmembrane helix, and G: cytoplasmic tail. Nucleotide sequences of the chimeric receptors can be  
 597 found in Suppl. File 3. **B**) In11-dependent ROS production following the heterologous expression of  
 598 receptors in *N. benthamiana*. Shown are relative luminescence units (RLU) after treatment with H<sub>2</sub>O (grey),  
 599 or the peptide In11 (1 μM, blue). Curves indicate mean ± SD for four independent biological replicates (n=4  
 600 plants), with each biological replicate representing six technical replicates. **C**) Ethylene production following  
 601 the heterologous expression of receptors in *N. benthamiana*. Ethylene production was quantified after  
 602 infiltration with H<sub>2</sub>O (grey) or the peptide In11 (1 μM, blue). Dots represent independent biological replicates  
 603 (n=6 plants). Significance was tested by performing a paired Wilcoxon signed-rank test (ns non-significant,  
 604 \* p ≤ 0.05).

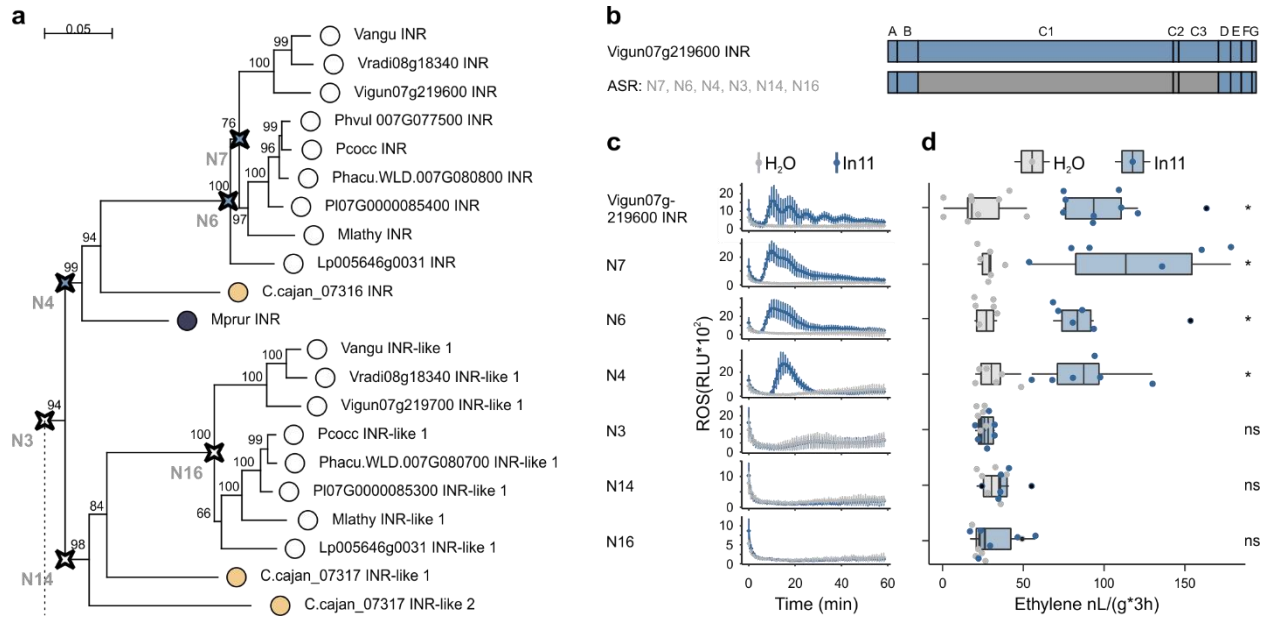

605

606 **Fig. 5: Functional analysis of ancestrally reconstructed LRR domains of INR and INR-like receptors.**

607 **A)** Part of the phylogenetic analyses of the LRR (C1-3 domain) of LRR-RLPs from the contiguous *INR* locus  
 608 used for the ASR, full figure can be found in Suppl. Fig. 5. Ancestrally reconstructed nodes are marked with  
 609 a compass star (N7, N6, N4, N3, N14 and N16). The scale bar represents 0.05 AA substitutions per site.  
 610 Nucleotide sequences of the LRR domain can be found in Suppl. File 4. **B)** Schematic representation of  
 611 *Vigun07g219600* (blue, *VuINR*) and the six created ASR receptors used for structure-function analysis.  
 612 Subdomains were earlier described by Fritz-Laylin *et al.* 2005; A: putative signal peptide, B: one or two  
 613 pairs of Cys that may play structural roles, C: multiple LRRs with an intervening motif (C2) inserted, D:  
 614 linker domain, E: acidic domain, F: transmembrane helix, and G: cytoplasmic tail. Nucleotide sequences of  
 615 the chimeric receptors can be found in Suppl. File 3. **C)** In11-dependent ROS production following the  
 616 heterologous expression of the ASR receptors in *N. benthamiana*. Relative luminescence units (RLU) are  
 617 shown after treatment with H<sub>2</sub>O (grey), or the peptide In11 (1 μM, blue). Curves indicate mean +/- SD for  
 618 four independent biological replicates (n=4 plants), with each biological replicate representing six technical  
 619 replicates. **D)** Ethylene production following the heterologous expression of receptors in *N. benthamiana*.  
 620 Ethylene production was quantified after infiltration with H<sub>2</sub>O (grey) or the peptide In11 (1 μM, blue). Dots  
 621 represent independent biological replicates (n≥6 plants). Significance was tested by performing a paired  
 622 Wilcoxon signed-rank test (ns non-significant, \* p ≤ 0.05).

623 Supplemental Figures

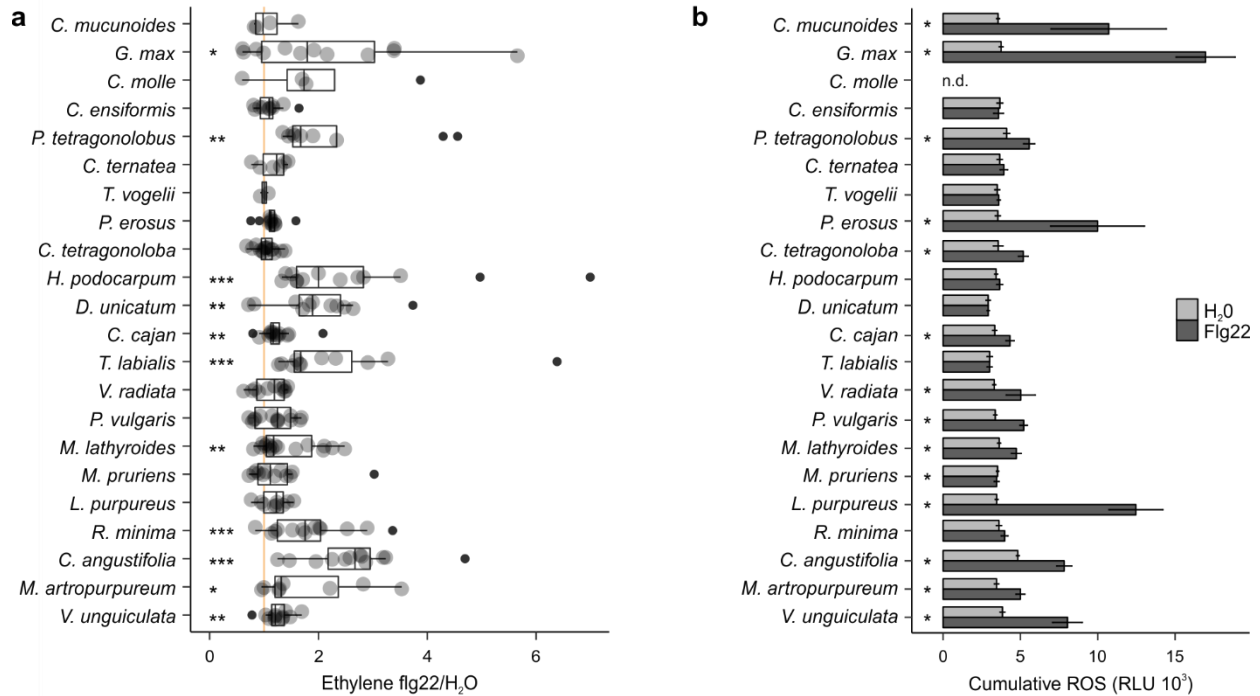

624

625 **Suppl. Fig. 1: Flg22-induced ROS and ethylene responses are idiosyncratic across Millettoid and**  
 626 **non-Millettoid legume species. A)** Individual trifoliolate leaflets were scratch wounded and treated with 1  
 627  $\mu\text{M}$  flg22 or H<sub>2</sub>O. The ratio of ethylene production for leaflets within the same leaf is shown (x-axis). Species  
 628 are listed in order of ln11/H<sub>2</sub>O response as per Fig. 1. The vertical orange line shows a ratio equal to one,  
 629 *i.e.* no induced ethylene response to ln11. Biological replicate plants are shown as separate dots.  
 630 Significant differences between the control and the treatment of interest are indicated (paired Wilcoxon  
 631 signed-rank test; ns non-significant, \*  $p \leq 0.05$ , \*\*  $p \leq 0.01$  and \*\*\*  $p \leq 0.001$ ). **B)** ROS-bursts are used a  
 632 second marker of plant immunity response upon application of flg22. Shown is cumulative ROS data (3-  
 633 60min) of four technical replicates in relative luminescence units (RLU) over 1 hour (1 observation/minute)  
 634 after treatment with H<sub>2</sub>O, or the peptide flg22 (1  $\mu\text{M}$ ). No ROS data was determined for *Centrosema molle*  
 635 (n.d.). Significant differences between the control and the treatment of interest were found by performing a  
 636 2-group Mann-Whitney U Test (\*  $p \leq 0.05$ ).

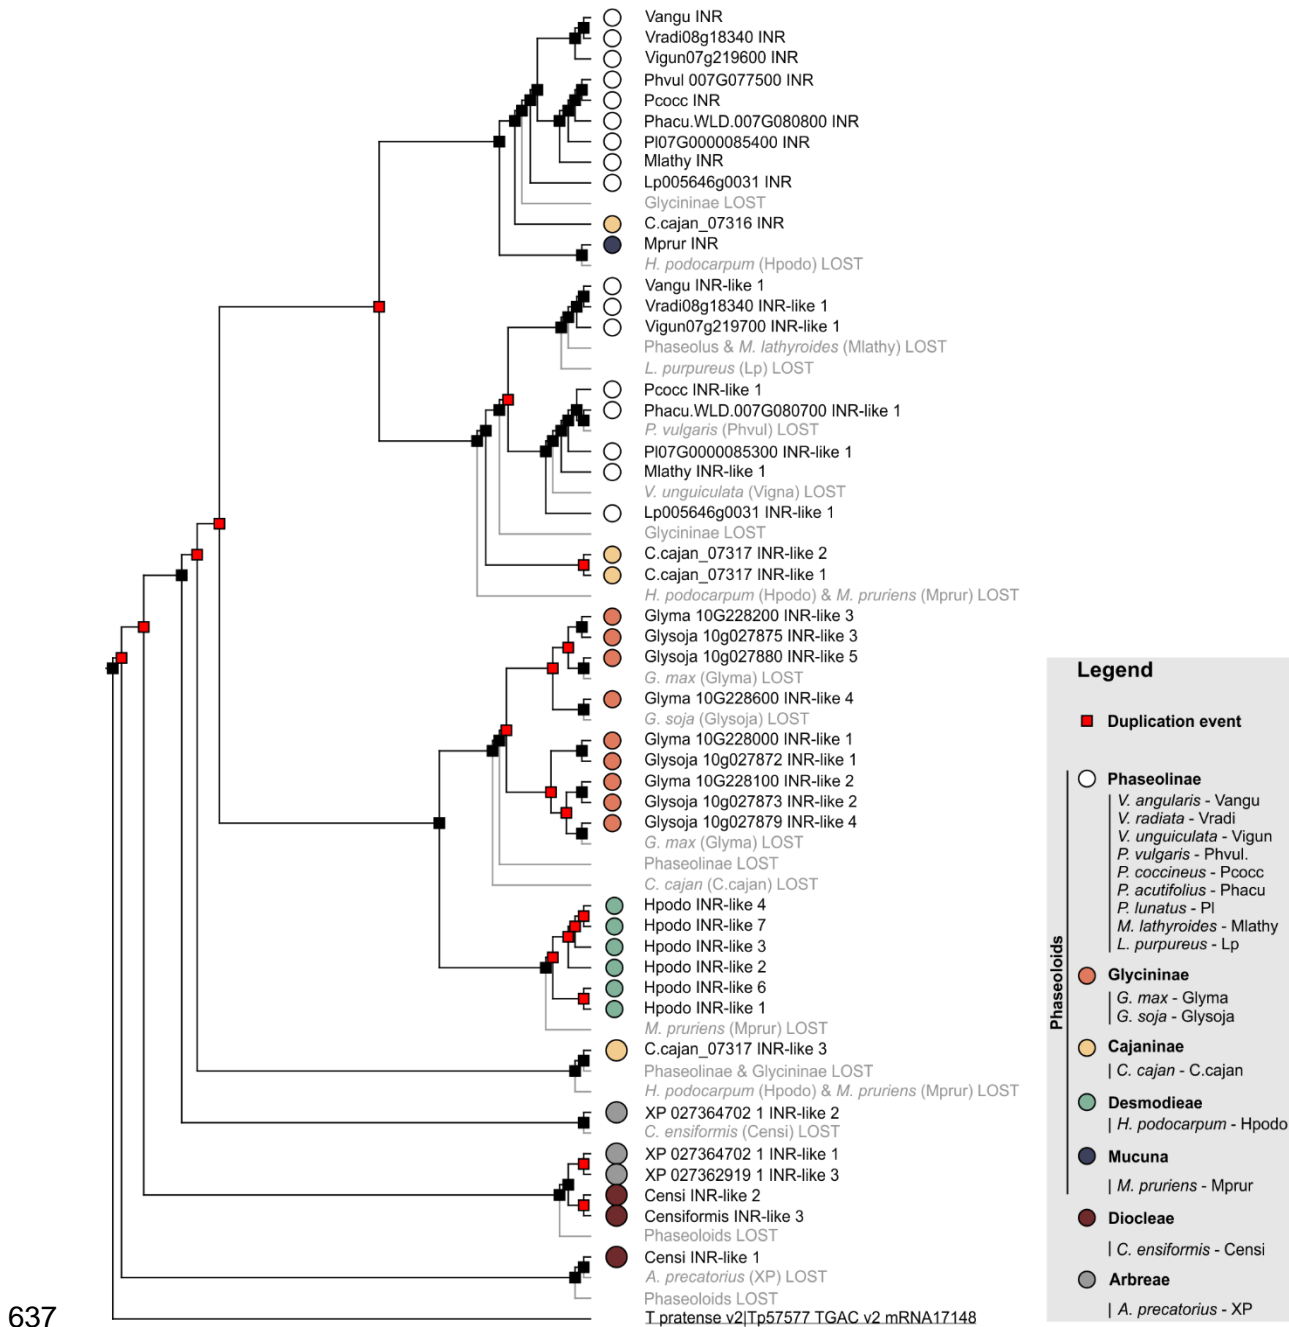

638 **Suppl. Fig. 2: Prediction of gene duplication and gene loss events throughout the evolution of the**  
 639 **contiguous INR locus in the Millettioideae.** Gene tree-species tree reconciliation to identify the duplication  
 640 and loss events at each branch using Notung<sup>43</sup>. Predicted duplication events are marked with a red square,  
 641 black squares represent speciation events, and lost nodes/genes are highlighted in grey. Filled dots indicate  
 642 species of origin according to legend, where different colors indicate different subtribes. A *T. pratense* LRR-  
 643 RLP was used as an outgroup to root the phylogenetic gene tree and is underlined.

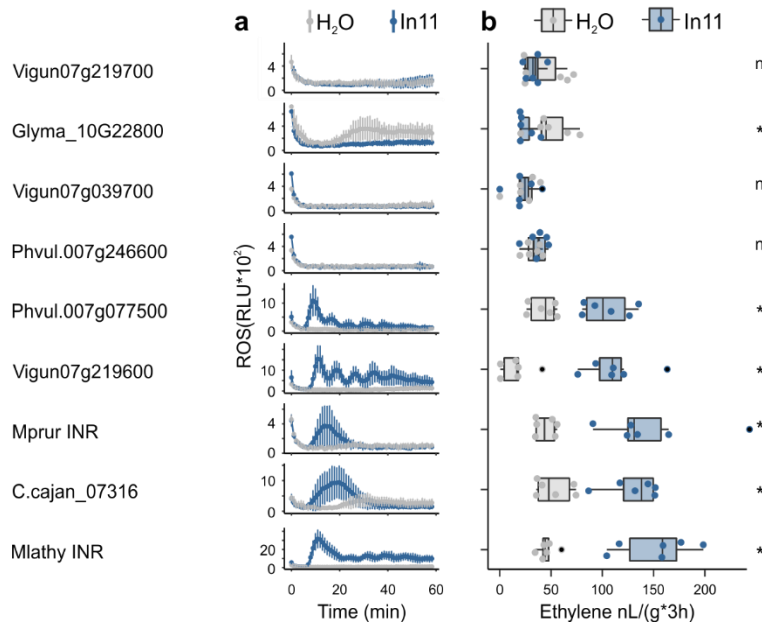

644

645 **Suppl. Fig. 3: In11-induced ROS and ethylene production conferred by INR and INR-like after**  
 646 **heterologous expression.** In11-dependent plant immunity response data following heterologous  
 647 expression of multiple receptor constructs in *N. benthamiana*. **A)** Shown are cumulative relative  
 648 luminescence units (RLU) after treatment with H<sub>2</sub>O (grey), or the peptide In11 (1 μM, blue). Curves indicate  
 649 mean +/- SD for four independent biological replicates (n=4 plants), with each biological replicate  
 650 representing six technical replicates. **B)** The x-axis shows the amount of ethylene released after infiltration  
 651 with 1 μM In11 (blue) or water (grey). Dots represent independent biological replicates (n=6 plants).  
 652 Significance was tested by performing a paired Wilcoxon signed-rank test (ns non-significant, \* p ≤ 0.05).

653

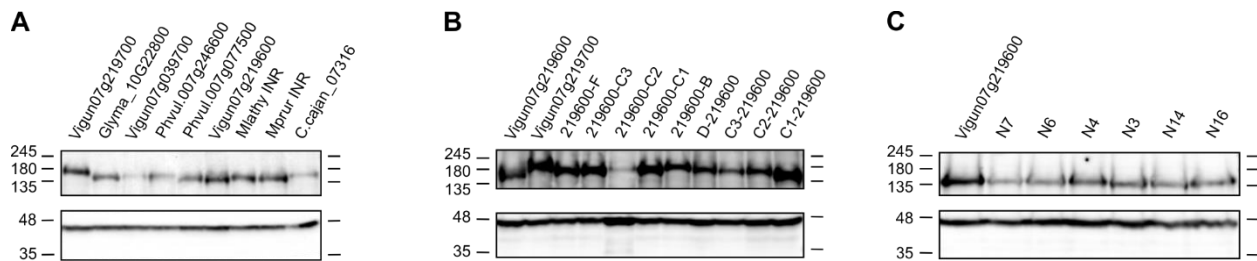

654

655 **Suppl. Fig. 4: Western blot of the heterologously expressed constructs in *N. benthamiana*.** Tissue  
 656 was harvested 48h after construct infiltration in *N. benthamiana*. Western blots were probed with 1) GFP  
 657 antibody as the receptor constructs had a C-terminal GFP tag (top), and 2) actin antibody as a loading  
 658 control (bottom). Western blots show all heterologously expressed receptors of which response to In11 was  
 659 tested: **A)** INR and INR-like homologues from diverse legumes, **B)** chimeric receptors, **C)** ASR receptors.

660

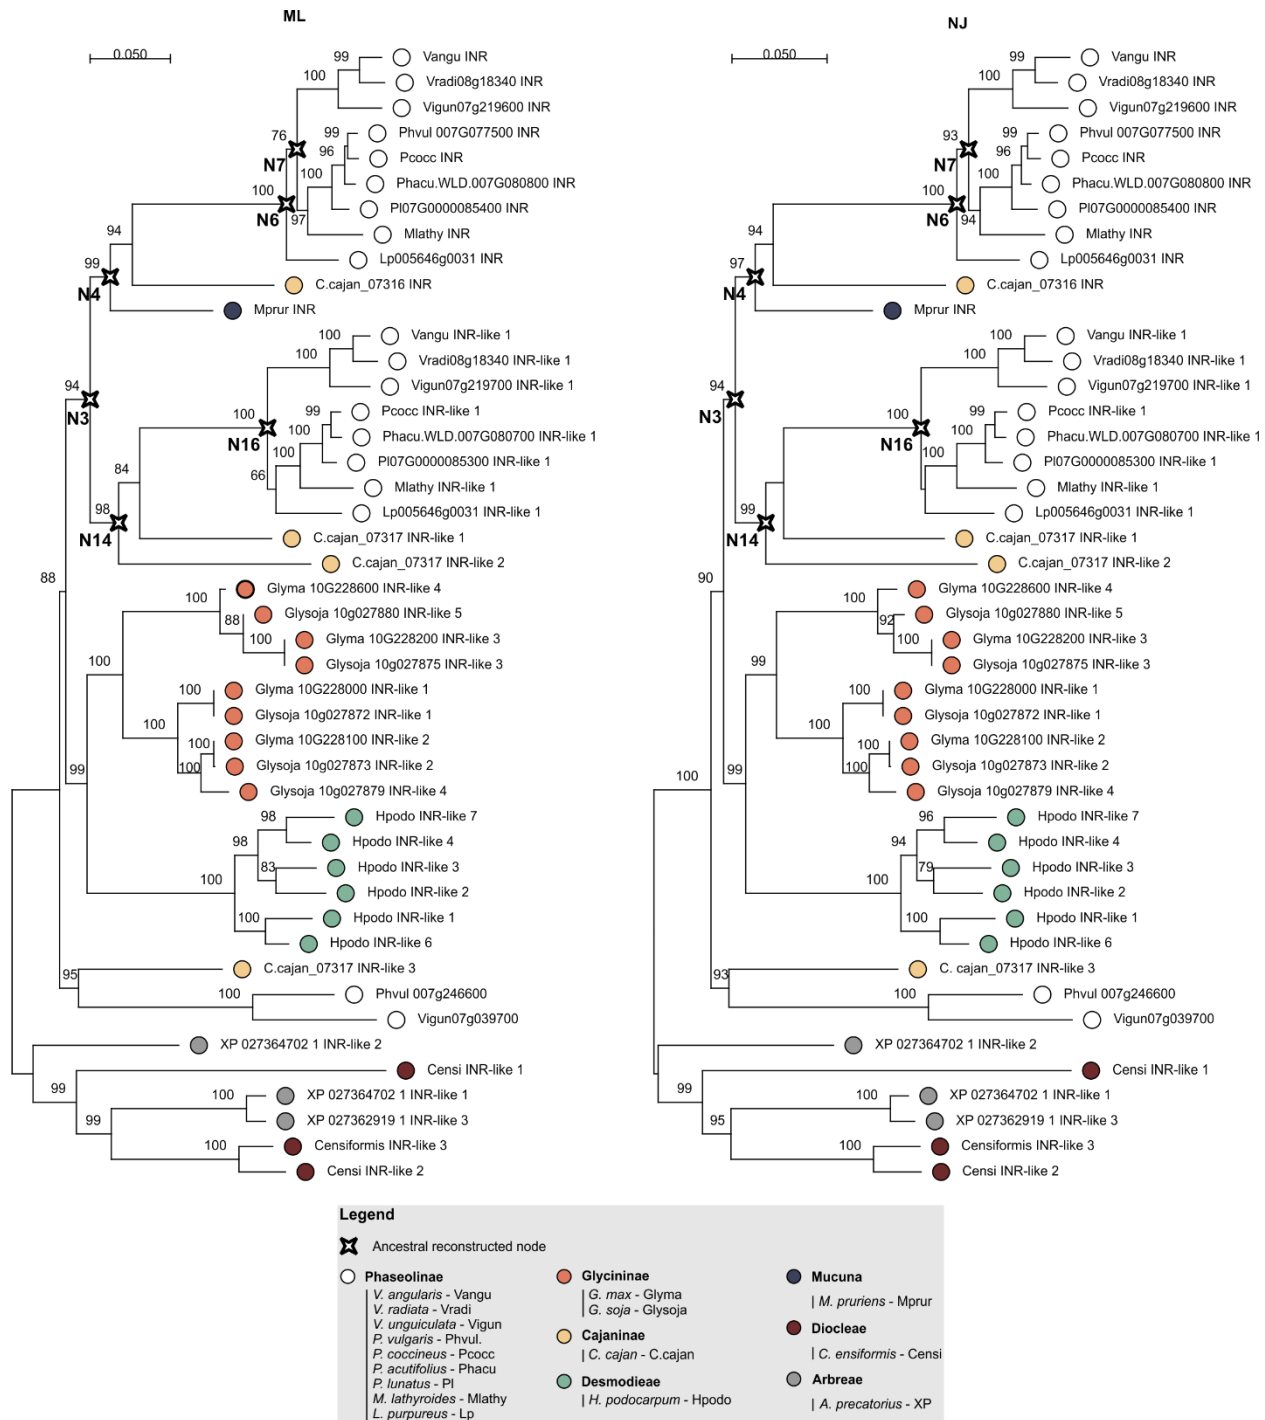

661

662 **Suppl. Fig. 5: Phylogenetic analyses of the LRR (C1-3 domain) of LRR-RLPs from the contiguous**  
 663 ***INR* locus.** The phylogenetic trees were built using MEGA X software and 1000 bootstraps<sup>80</sup>. Maximum  
 664 likelihood (ML – left side) and neighbor joining (NJ – right side) trees were calculated based on all codon  
 665 positions of a codon-based alignment<sup>81</sup>. Maximum likelihood analysis bootstrap values are indicated, only  
 666 values higher than 65 are shown. The scale bar represents 0.05 AA substitutions per site. The ancestral  
 667 reconstructed nodes selected for functional validation are marked with a compass star (N7, N6, N4, N3,  
 668 N14 and N16). Filled dots indicate species of origin according to legend, where different colors indicate  
 669 different subtribes.

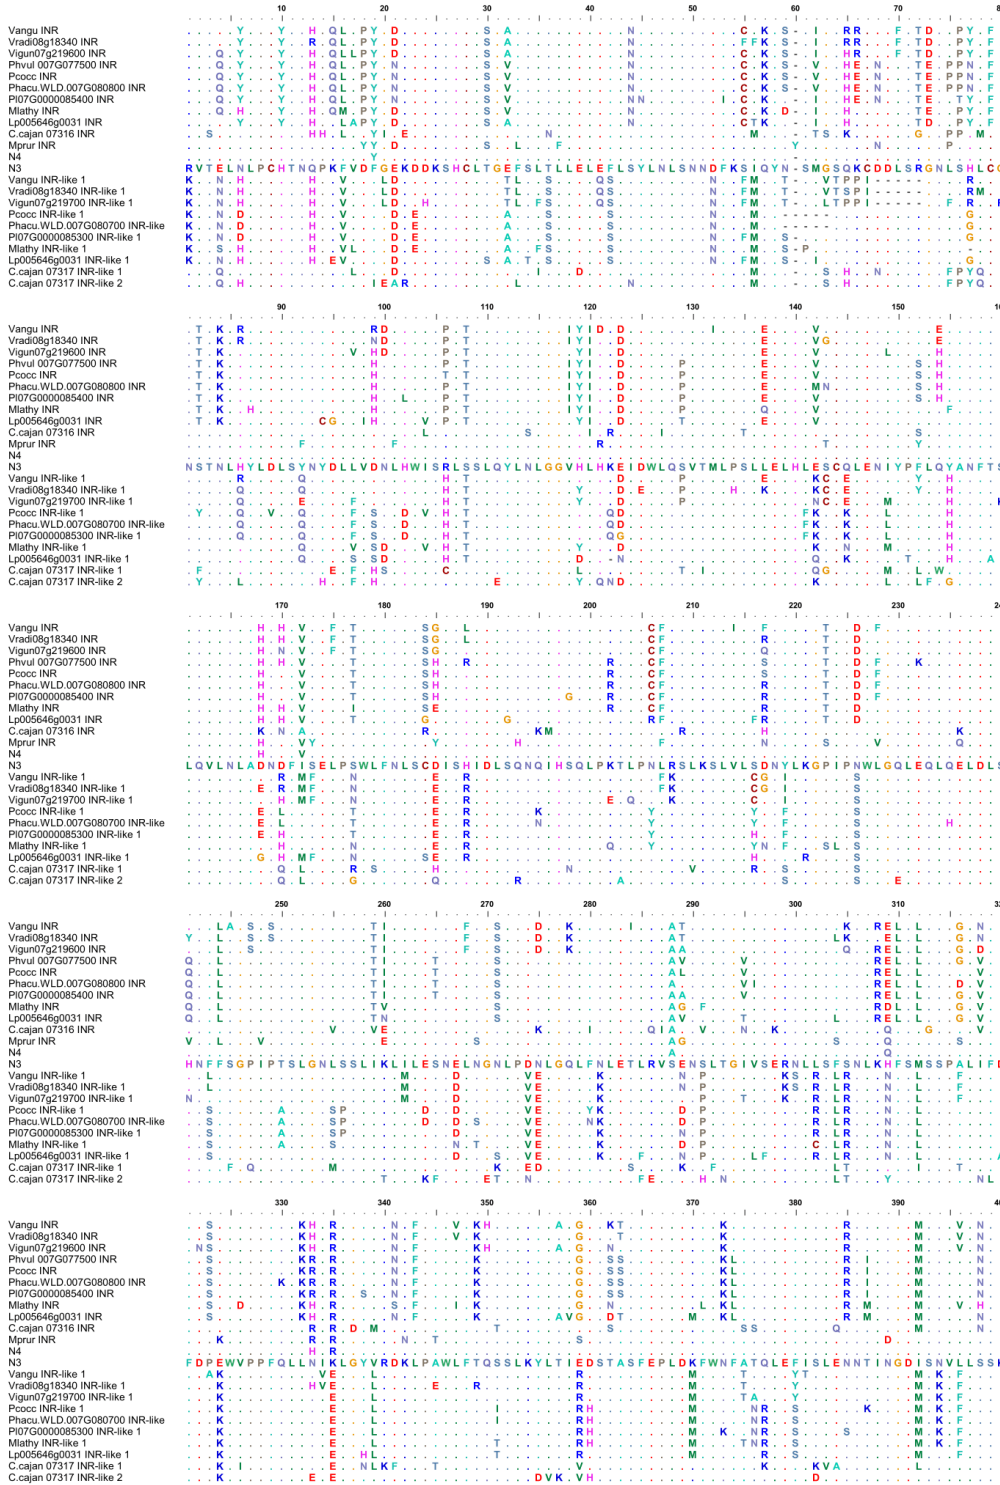

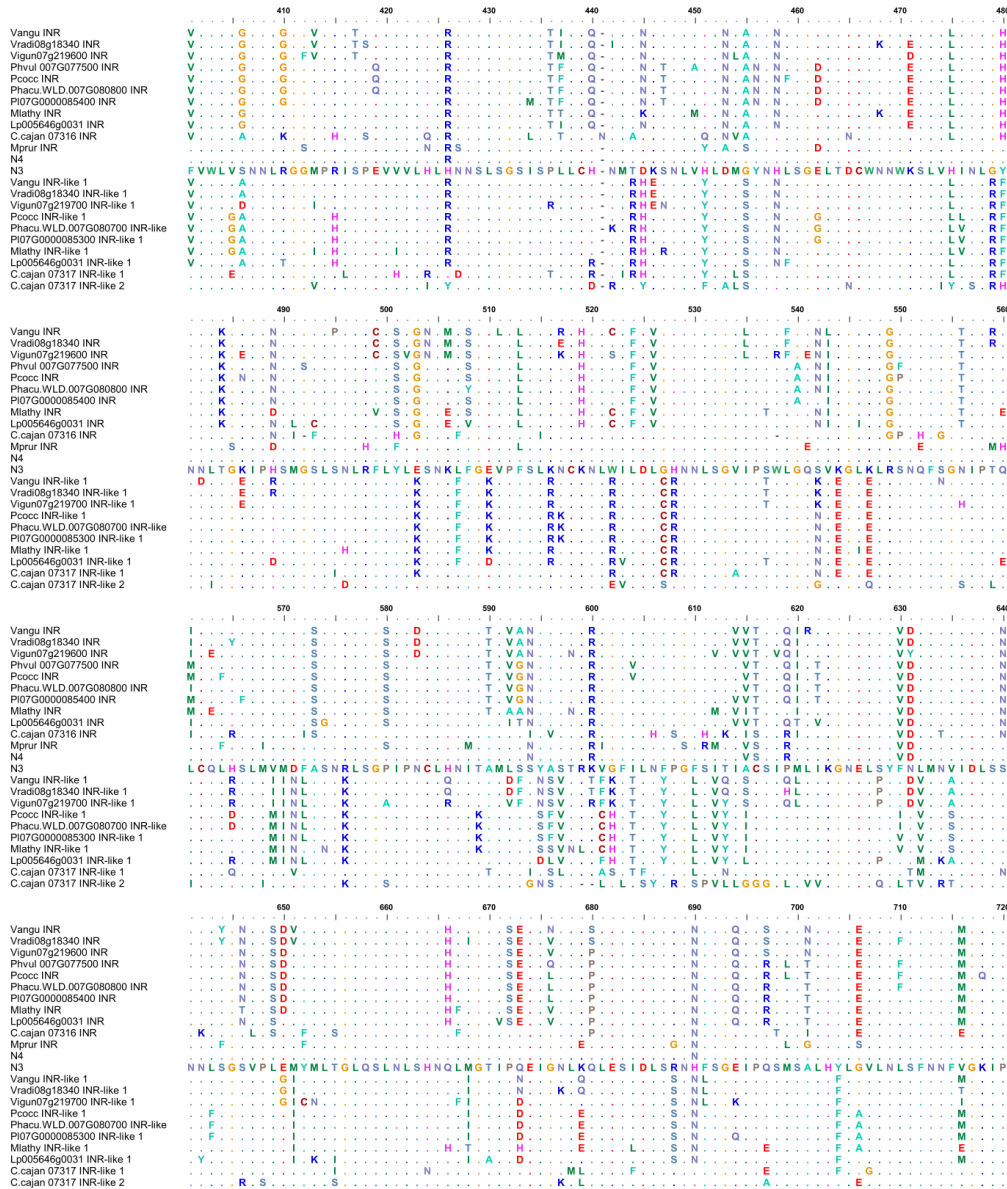

671

672 **Suppl. Fig. 6: AA sequence alignment of the LRR domains of the *INR* clade, INR-like 1 clade and the**  
673 **closest ancestral reconstructed nodes with differential In11-response.**

674 **Supplemental Table legends**

675 **Suppl. Table 1: Overview of the used legume species, accessions, and their origin**

676 **Suppl. Table 2: Overview of ethylene response data of legume species**

677 **Suppl. Table 3: Overview of mined assemblies of contiguous *INR* loci (+ coordinates) and LRR-**  
678 **RLPs**

679 **Suppl. Table 4: Genome assembly stats**

680 **Suppl. Table 5: Primers used in this study**



## 681 Supplemental file legends

682 **Suppl. File 1: Fasta file of nt sequences of the INR syntenic loci incorporated in the contiguous**  
683 **INR locus analysis**

684 **Suppl. File 2: Fasta file of the AA sequences INR and INR-like homologues included in the**  
685 **phylogenetic analysis**

686 **Suppl. File 3: Fasta file containing the sequences of the chimeric receptors**

687 **Suppl. File 4: Fasta file containing the nucleotide LRR domain sequences of the INR and INR-like**  
688 **homologues used for the ASR analysis and the resulting predicted (and domesticated for MoClo)**  
689 **LRR domain sequences for the ancestral nodes of interest**

## 690 References

- 691 1. DeFalco, T. A. & Zipfel, C. Molecular mechanisms of early plant pattern-triggered  
692 immune signaling. *Mol. Cell* **81**, 3449–3467 (2021).
- 693 2. Snoeck, S., Guayazán-Palacios, N. & Steinbrenner, A. D. Molecular tug-of-war:  
694 plant immune recognition of herbivory. *Plant Cell* **00**, 1–17 (2022).
- 695 3. Albert, I., Hua, C., Nürnberger, T., Pruitt, R. N. & Zhang, L. Surface sensor  
696 systems in plant immunity. *Plant Physiol.* **182**, 1582–1596 (2020).
- 697 4. Monaghan, J. & Zipfel, C. Plant pattern recognition receptor complexes at the  
698 plasma membrane. *Curr. Opin. Plant Biol.* **15**, 349–357 (2012).
- 699 5. Wang, G. *et al.* A genome-wide functional investigation into the roles of receptor-  
700 like proteins in Arabidopsis. *Plant Physiol.* **147**, 503–517 (2008).
- 701 6. Fritz-Laylin, L. K., Krishnamurthy, N., Tör, M., Sjölander, K. V. & Jones, J. D. G.  
702 Phylogenomic analysis of the receptor-like proteins of rice and Arabidopsis. *Plant*  
703 *Physiol.* **138**, 611–623 (2005).
- 704 7. Shiu, S. H. & Bleeker, A. B. Expansion of the receptor-like kinase/Pelle gene  
705 family and receptor-like proteins in Arabidopsis. *Plant Physiol.* **132**, 530–543  
706 (2003).
- 707 8. Shiu, S. H. & Bleeker, A. B. Receptor-like kinases from Arabidopsis form a  
708 monophyletic gene family related to animal receptor kinases. *Proc. Natl. Acad.*  
709 *Sci.* **98**, 10763–10768 (2001).
- 710 9. Fischer, I., Diévert, A., Droc, G., Dufayard, J.-F. & Chantret, N. Evolutionary  
711 dynamics of the leucine-rich repeat receptor-like kinase (LRR-RLK) subfamily in  
712 angiosperms. *Plant Physiol.* **170**, 1595–1610 (2016).
- 713 10. Hohmann, U., Lau, K. & Hothorn, M. The structural basis of ligand perception and  
714 signal activation by receptor kinases. *Annual Review of Plant Biology* vol. 68 109–  
715 137 (2017).
- 716 11. Restrepo-Montoya, D., Brueggeman, R., McClean, P. E. & Osorno, J. M.  
717 Computational identification of receptor-like kinases ‘RLK’ and receptor-like  
718 proteins ‘RLP’ in legumes. *BMC Genomics* **21**, 1–17 (2020).
- 719 12. Lehti-Shiu, M. D., Zou, C., Hanada, K. & Shiu, S.-H. Evolutionary history and  
720 stress regulation of plant receptor-like kinase/pelle genes. *Plant Physiol.* **150**, 12–  
721 26 (2009).
- 722 13. Pok, B. *et al.* Concerted expansion and contraction of immune receptor gene

- 723 repertoires in plant genomes. *bioRxiv* 2022.01.01.474684 (2022)  
724 doi:10.1101/2022.01.01.474684.
- 725 14. Jamieson, P. A., Shan, L. & He, P. Plant cell surface molecular cypher: receptor-  
726 like proteins and their roles in immunity and development. *Plant Sci.* **274**, 242–  
727 251 (2018).
- 728 15. Tang, P. *et al.* Disease resistance signature of the leucine-rich repeat receptor-  
729 like kinase genes in four plant species. *Plant Sci.* **179**, 399–406 (2010).
- 730 16. Pruitt, R. N. *et al.* The EDS1–PAD4–ADR1 node mediates Arabidopsis pattern-  
731 triggered immunity. *Nat. 2021 5987881* **598**, 495–499 (2021).
- 732 17. Steinbrenner, A. D. The evolving landscape of cell surface pattern recognition  
733 across plant immune networks. *Curr. Opin. Plant Biol.* **56**, 135–146 (2020).
- 734 18. Jones, D. A., Thomas, C. M., Hammond-Kosack, K. E., Balint-Kurti, P. J. & Jones,  
735 J. D. G. Isolation of the tomato Cf-9 gene for resistance to *Cladosporium fulvum*  
736 by transposon tagging. *Science (80- )*. **266**, 789–793 (1994).
- 737 19. Thomas, C. M. *et al.* Characterization of the tomato Cf-4 gene for resistance to  
738 *Cladosporium fulvum* identifies sequences that determine recognitional specificity  
739 in Cf-4 and Cf-9. *Plant Cell* **9**, 2209–2224 (1997).
- 740 20. Kruijt, M., Kip, D. J., Joosten, M. H. A. J., Brandwagt, B. F. & De Wit, P. J. G. M.  
741 The Cf-4 and Cf-9 resistance genes against *Cladosporium fulvum* are conserved  
742 in wild tomato species. <http://dx.doi.org/10.1094/MPMI-18-1011> **18**, 1011–1021  
743 (2007).
- 744 21. Dixon, M. S. *et al.* The tomato Cf-2 disease resistance locus comprises two  
745 functional genes encoding leucine-rich repeat proteins. *Cell* **84**, 451–459 (1996).
- 746 22. Luderer, R., Takken, F. L. W., De Wit, P. J. G. M. & Joosten, M. H. A. J.  
747 *Cladosporium fulvum* overcomes Cf-2-mediated resistance by producing  
748 truncated AVR2 elicitor proteins. *Mol. Microbiol.* **45**, 875–884 (2002).
- 749 23. Krüger, J. *et al.* A tomato cysteine protease required for Cf-2-dependent disease  
750 resistance and suppression of autonecrosis. *Science (80- )*. **296**, 744–747  
751 (2002).
- 752 24. Rooney, H. C. E. *et al.* Plant science: *Cladosporium Avr2* inhibits tomato Rcr3  
753 protease required for Cf-2-dependent disease resistance. *Science (80- )*. **308**,  
754 1783–1786 (2005).
- 755 25. Zhang, L. *et al.* Fungal endopolygalacturonases are recognized as microbe-  
756 associated molecular patterns by the Arabidopsis receptor-like protein  
757 RESPONSIVENESS TO BOTRYTIS POLYGALACTURONASES1. *Plant Physiol.*  
758 **164**, 352–364 (2014).
- 759 26. Zhang, L. *et al.* Distinct immune sensor systems for fungal  
760 endopolygalacturonases in closely related Brassicaceae. *Nat. Plants 2021 79 7*,  
761 1254–1263 (2021).
- 762 27. Albert, I. *et al.* An RLP23–SOBIR1–BAK1 complex mediates NLP-triggered  
763 immunity. *Nat. Plants 2015 110 1*, 1–9 (2015).
- 764 28. Jehle, A. K. *et al.* The receptor-like protein ReMAX of Arabidopsis detects the  
765 microbe-associated molecular pattern eMax from *Xanthomonas*. *Plant Cell* **25**,  
766 2330–2340 (2013).

- 767 29. Hegenauer, V. *et al.* The tomato receptor CuRe1 senses a cell wall protein to  
768 identify *Cuscuta* as a pathogen. *Nat. Commun.* 2020 111 **11**, 1–7 (2020).
- 769 30. Hegenauer, V. *et al.* Detection of the plant parasite *Cuscuta reflexa* by a tomato  
770 cell surface receptor. *Science (80-. )*. **353**, 478–481 (2016).
- 771 31. Steinbrenner, A. D. *et al.* A receptor-like protein mediates plant immune  
772 responses to herbivore-associated molecular patterns. *Proc. Natl. Acad. Sci.* **117**,  
773 31510–31518 (2020).
- 774 32. Schmelz, E. A. *et al.* Fragments of ATP synthase mediate plant perception of  
775 insect attack. *Proc. Natl. Acad. Sci.* **103**, 8894–8899 (2006).
- 776 33. Schmelz, E. A. *et al.* An amino acid substitution inhibits specialist herbivore  
777 production of an antagonist effector and recovers insect-induced plant defenses.  
778 *PLANT Physiol.* **160**, 1468–1478 (2012).
- 779 34. Schmelz, E. A., LeClere, S., Carroll, M. J., Alborn, H. T. & Teal, P. E. A. Cowpea  
780 chloroplastic ATP synthase is the source of multiple plant defense elicitors during  
781 insect herbivory. *Plant Physiol.* **144**, 793–805 (2007).
- 782 35. Albert, I., Zhang, L., Bemm, H. & Nürnberger, T. Structure-function analysis of  
783 immune receptor AtRLP23 with its ligand nlp20 and coreceptors AtSOBIR1 and  
784 AtBAK1. *Mol. Plant-Microbe Interact.* **32**, 1038–1046 (2019).
- 785 36. Delaux, P. M. *et al.* Reconstructing trait evolution in plant evo–devo studies. *Curr.*  
786 *Biol.* **29**, R1110–R1118 (2019).
- 787 37. Białas, A. *et al.* Two nlr immune receptors acquired high-affinity binding to a  
788 fungal effector through convergent evolution of their integrated domain. *Elife* **10**,  
789 e66961 (2021).
- 790 38. Read, A. C. *et al.* Genome assembly and characterization of a complex zfBED-  
791 NLR gene-containing disease resistance locus in Carolina Gold Select rice with  
792 Nanopore sequencing. *PLoS Genet.* **16**, e1008571 (2020).
- 793 39. Michael, T. P. & VanBuren, R. Building near-complete plant genomes. *Curr. Opin.*  
794 *Plant Biol.* **54**, 26–33 (2020).
- 795 40. Goodin, M. M., Zaitlin, D., Naidu, R. A. & Lommel, S. A. *Nicotiana benthamiana*:  
796 its history and future as a model for plant-pathogen interactions. *Mol. Plant-*  
797 *Microbe Interact.* **21**, 1015–1026 (2008).
- 798 41. Cardoso, D. *et al.* Filling in the gaps of the papilionoid legume phylogeny: The  
799 enigmatic Amazonian genus *Petaladenium* is a new branch of the early-diverging  
800 Amburaneae clade. *Mol. Phylogenet. Evol.* **84**, 112–124 (2015).
- 801 42. Zhao, Y. *et al.* Nuclear phylotranscriptomics and phylogenomics support  
802 numerous polyploidization events and hypotheses for the evolution of rhizobial  
803 nitrogen-fixing symbiosis in Fabaceae. *Mol. Plant* **14**, 748–773 (2021).
- 804 43. Chen, K., Durand, D. & Farach-Colton, M. NOTUNG: A program for dating gene  
805 duplications and optimizing gene family trees. <https://home.liebertpub.com/cmb> **7**,  
806 429–447 (2004).
- 807 44. Liu, Y. *et al.* Pan-genome of wild and cultivated soybeans. *Cell* **182**, 162-176.e13  
808 (2020).
- 809 45. Randall, R. N., Radford, C. E., Roof, K. A., Natarajan, D. K. & Gaucher, E. A. An  
810 experimental phylogeny to benchmark ancestral sequence reconstruction. *Nat.*

- 811 *Commun.* **7**, 1–6 (2016).
- 812 46. Schultink, A. & Steinbrenner, A. D. A playbook for developing disease-resistant  
813 crops through immune receptor identification and transfer. *Curr. Opin. Plant Biol.*  
814 **62**, 102089 (2021).
- 815 47. Lacombe, S. *et al.* Interfamily transfer of a plant pattern-recognition receptor  
816 confers broad-spectrum bacterial resistance. *Nat. Biotechnol.* **2010 284 28**, 365–  
817 369 (2010).
- 818 48. Pfeilmeier, S. *et al.* Expression of the *Arabidopsis thaliana* immune receptor EFR  
819 in *Medicago truncatula* reduces infection by a root pathogenic bacterium, but not  
820 nitrogen-fixing rhizobial symbiosis. *Plant Biotechnol. J.* **17**, 569–579 (2019).
- 821 49. Kourelis, J. *et al.* Evolution of a guarded decoy protease and its receptor in  
822 solanaceous plants. *Nat. Commun.* **2020 111 11**, 1–15 (2020).
- 823 50. Shi, T., Huang, H., Sanderson, M. J. & Tax, F. E. Evolutionary dynamics of  
824 leucine-rich repeat receptor-like kinases and related genes in plants: a  
825 phylogenomic approach. *J. Integr. Plant Biol.* **56**, 648–662 (2014).
- 826 51. Restrepo-Montoya, D., McClean, P. E. & Osorno, J. M. Orthology and synteny  
827 analysis of receptor-like kinases “RLK” and receptor-like proteins “RLP” in  
828 legumes. *BMC Genomics* **22**, 1–17 (2021).
- 829 52. Wang, L. *et al.* The pattern-recognition receptor CORE of Solanaceae detects  
830 bacterial cold-shock protein. *Nat. Plants* **2016 212 2**, 1–9 (2016).
- 831 53. Zipfel, C. *et al.* Perception of the bacterial PAMP EF-Tu by the receptor EFR  
832 Restricts *Agrobacterium*-mediated transformation. *Cell* **125**, 749–760 (2006).
- 833 54. Wei, Y. *et al.* An immune receptor complex evolved in soybean to perceive a  
834 polymorphic bacterial flagellin. *Nat. Commun.* **2020 111 11**, 1–11 (2020).
- 835 55. Fürst, U. *et al.* Perception of *Agrobacterium tumefaciens* flagellin by FLS2XL  
836 confers resistance to crown gall disease. *Nat. Plants* **2020 61 6**, 22–27 (2020).
- 837 56. Sun, Y. *et al.* Structural basis for flg22-induced activation of the *Arabidopsis*  
838 FLS2-BAK1 immune complex. *Science (80- )*. **342**, 624–628 (2013).
- 839 57. Wan, W. L. *et al.* Comparing *Arabidopsis* receptor kinase and receptor protein-  
840 mediated immune signaling reveals BIK1-dependent differences. *New Phytol.*  
841 **221**, 2080–2095 (2019).
- 842 58. Felix, G., Duran, J. D., Volko, S. & Boller, T. Plants have a sensitive perception  
843 system for the most conserved domain of bacterial flagellin. *Plant J.* **18**, 265–276  
844 (1999).
- 845 59. Schmelz, E. A., Alborn, H. T., Banchio, E. & Tumlinson, J. H. Quantitative  
846 relationships between induced jasmonic acid levels and volatile emission in *Zea*  
847 *mays* during *Spodoptera exigua* herbivory. *Planta* **216**, 665–673 (2003).
- 848 60. R Development Core Team. R: a language and environment for statistical  
849 computing. *R Found. Stat. Comput.* **1**, 409 (2015).
- 850 61. Wickham, H. & Francois, R. dplyr: a grammar of data manipulation. **3**, 156 (2015).
- 851 62. Wickham, H. ggplot2 elegant graphics for data analysis. *Media* **35**, 211 (2009).
- 852 63. Lutz, K. A., Wang, W., Zdepski, A. & Michael, T. P. Isolation and analysis of high  
853 quality nuclear DNA with reduced organellar DNA for plant genome sequencing  
854 and resequencing. *BMC Biotechnol.* **11**, 1–9 (2011).

- 855 64. Lonardi, S. *et al.* The genome of cowpea (*Vigna unguiculata* [L.] Walp.). *Plant J.*  
856 **98**, 767–782 (2019).
- 857 65. Kang, Y. J. *et al.* Genome sequence of mungbean and insights into evolution  
858 within *Vigna* species. *Nat. Commun.* **5**, 1–9 (2014).
- 859 66. Kang, Y. J. *et al.* Draft genome sequence of adzuki bean, *Vigna angularis*. *Sci.*  
860 *Rep.* **5**, 1–8 (2015).
- 861 67. Schmutz, J. *et al.* Genome sequence of the palaeopolyploid soybean. *Nature* **463**,  
862 178–183 (2010).
- 863 68. Chang, Y. *et al.* The draft genomes of five agriculturally important African orphan  
864 crops. *Gigascience* **8**, 1–16 (2018).
- 865 69. Varshney, R. K. *et al.* Draft genome sequence of pigeonpea (*Cajanus cajan*), an  
866 orphan legume crop of resource-poor farmers. *Nat. Biotechnol.* **30**, 83–89 (2012).
- 867 70. Schmutz, J. *et al.* A reference genome for common bean and genome-wide  
868 analysis of dual domestications. *Nat. Genet.* **46**, 707–713 (2014).
- 869 71. Xie, M. *et al.* A reference-grade wild soybean genome. *Nat. Commun.* **10**, 1–12  
870 (2019).
- 871 72. Li, H. & Durbin, R. Fast and accurate short read alignment with Burrows-Wheeler  
872 transform. *Bioinformatics* **25**, 1754–1760 (2009).
- 873 73. Li, H. *et al.* The sequence alignment/map format and SAMtools. *Bioinformatics*  
874 **25**, 2078–2079 (2009).
- 875 74. Katoh, K., Misawa, K., Kuma, K. & Miyata, T. MAFFT: a novel method for rapid  
876 multiple sequence alignment based on fast Fourier transform. *Nucleic Acids Res.*  
877 **30**, 3059–3066 (2002).
- 878 75. Miller, M. A., Pfeiffer, W. & Schwartz, T. Creating the CIPRES science gateway  
879 for inference of large phylogenetic trees. in *2010 Gateway Computing*  
880 *Environments Workshop, GCE 2010* 1–8 (IEEE, 2010).  
881 doi:10.1109/GCE.2010.5676129.
- 882 76. Stamatakis, A. RAxML version 8: a tool for phylogenetic analysis and post-  
883 analysis of large phylogenies. *Bioinformatics* **30**, 1312–3 (2014).
- 884 77. Weber, E., Engler, C., Gruetzner, R., Werner, S. & Marillonnet, S. A modular  
885 cloning system for standardized assembly of multigene constructs. *PLoS One* **6**,  
886 e16765 (2011).
- 887 78. Engler, C. *et al.* A Golden Gate modular cloning toolbox for plants. *ACS Synth.*  
888 *Biol.* **3**, 839–843 (2014).
- 889 79. Offord, V., Coffey, T. J. & Werling, D. LRRfinder: a web application for the  
890 identification of leucine-rich repeats and an integrative Toll-like receptor database.  
891 *Dev. Comp. Immunol.* **34**, 1035–1041 (2010).
- 892 80. Kumar, S., Stecher, G., Li, M., Knyaz, C. & Tamura, K. MEGA X: molecular  
893 evolutionary genetics analysis across computing platforms. *Mol. Biol. Evol.* **35**,  
894 1547 (2018).
- 895 81. Edgar, R. C. MUSCLE: multiple sequence alignment with high accuracy and high  
896 throughput. *Nucleic Acids Res.* **32**, 1792–1797 (2004).
- 897 82. Ashkenazy, H. *et al.* FastML: a web server for probabilistic reconstruction of  
898 ancestral sequences. *Nucleic Acids Res.* **40**, W580–W584 (2012).

- 899 83. Egan, A. N., Vatanparast, M. & Cagle, W. Parsing polyphyletic *Pueraria*:  
900 delimiting distinct evolutionary lineages through phylogeny. *Mol. Phylogenet. Evol.*  
901 **104**, 44–59 (2016).
- 902 84. Li, H. *et al.* Diversification of the phaseoloid legumes: effects of climate change,  
903 range expansion and habit shift. *Front. Plant Sci.* **4**, 386 (2013).
- 904 85. Lavin, M., Herendeen, P. S. & Wojciechowski, M. F. Evolutionary rates analysis of  
905 Leguminosae implicates a rapid diversification of lineages during the Tertiary.  
906 *Syst. Biol.* **54**, 575–594 (2005).
- 907 86. Stefanović, S., Pfeil, B. E., Palmer, J. D. & Doyle, J. J. Relationships among  
908 Phaseoloid legumes based on sequences from eight chloroplast regions. *Syst.*  
909 *Bot.* **34**, 115–128 (2009).
- 910
